# Supplementary material for: Bond softness sensitive bond-valence parameters for crystal structure plausibility tests
Source: PubMed Central journal article supplement (PMC5619853; doi:10.1107/s2052252517010211), 2017-08-02
Supplement: m-04-00614-sup1.pdf [file m-04-00614-sup1.pdf]

# IUCrJ

**Volume 4 (2017)**

**Supporting information for article:**

**Bond softness sensitive bond-valence parameters for crystal structure plausibility tests**

**Haomin Chen and Stefan Adams**

**S1. Bond valence parameters of *softBV*, *softNC1* and *convBV*****Table S1** Bond valence parameters of *softBV*, *softNC1* and *convBV*.

| Ions |                 |    |                 |     | <i>softBV</i> |                |                     |       | <i>softNC1</i> |                |                     |       | <i>convBV</i>  |                |                     |       |
|------|-----------------|----|-----------------|-----|---------------|----------------|---------------------|-------|----------------|----------------|---------------------|-------|----------------|----------------|---------------------|-------|
| M    | V <sub>id</sub> | X  | V <sub>id</sub> | n   | b             | R <sub>0</sub> | R <sub>cutoff</sub> | ΔV    | N <sub>c</sub> | R <sub>0</sub> | R <sub>cutoff</sub> | ΔV    | N <sub>c</sub> | R <sub>0</sub> | R <sub>cutoff</sub> | ΔV    |
| Ag   | 1               | As | -3              | 5   | 0.352         | 2.2683         | 6.50                | 0.069 | 2.80           | 2.2701         | 3.14                | 0.066 | 2.80           | 2.2522         | 3.30                | 0.067 |
| Ag   | 1               | Br | -1              | 6   | 0.470         | 2.0370         | 5.50                | 0.041 | 5.00           | 2.0411         | 3.48                | 0.040 | 5.00           | 2.1991         | 3.46                | 0.034 |
| Ag   | 1               | Cl | -1              | 9   | 0.429         | 1.9882         | 5.00                | 0.048 | 5.67           | 1.9931         | 3.36                | 0.054 | 5.67           | 2.0912         | 3.40                | 0.059 |
| Ag   | 1               | F  | -1              | 4   | 0.498         | 1.5295         | 5.00                | 0.113 | 8.00           | 1.5653         | 3.32                | 0.162 | 8.00           | 1.8224         | 3.25                | 0.189 |
| Ag   | 1               | I  | -1              | 13  | 0.530         | 2.0804         | 6.00                | 0.034 | 4.00           | 2.0929         | 3.59                | 0.030 | 4.00           | 2.3144         | 3.49                | 0.043 |
| Ag   | 1               | O  | -2              | 128 | 0.394         | 1.7824         | 5.00                | 0.074 | 4.43           | 1.8171         | 2.97                | 0.083 | 4.66           | 1.8458         | 3.08                | 0.080 |
| Ag   | 1               | P  | -3              | 2   | 0.377         | 2.1840         | 6.50                | 0.000 | 3.00           | 2.1859         | 3.15                | 0.003 | 3.00           | 2.1932         | 3.26                | 0.010 |
| Ag   | 1               | Se | -2              | 26  | 0.385         | 2.1741         | 5.00                | 0.081 | 4.38           | 2.1858         | 3.31                | 0.090 | 4.46           | 2.2056         | 3.42                | 0.088 |
| Ag   | 1               | S  | -2              | 51  | 0.365         | 2.1101         | 5.00                | 0.062 | 3.63           | 2.1272         | 3.13                | 0.074 | 3.84           | 2.1162         | 3.30                | 0.073 |
| Ag   | 1               | Te | -2              | 11  | 0.420         | 2.3449         | 5.00                | 0.056 | 3.91           | 2.3508         | 3.53                | 0.058 | 3.91           | 2.4168         | 3.58                | 0.060 |
| Ag   | 2               | F  | -1              | 16  | 0.509         | 1.5864         | 5.50                | 0.034 | 6.25           | 1.6284         | 2.94                | 0.061 | 6.25           | 1.7752         | 2.86                | 0.065 |
| Ag   | 2               | O  | -2              | 2   | 0.501         | 1.7221         | 5.50                | 0.078 | 5.00           | 1.7530         | 2.94                | 0.062 | 5.00           | 1.8676         | 2.87                | 0.169 |
| Ag   | 3               | F  | -1              | 4   | 0.452         | 1.7149         | 5.50                | 0.018 | 4.50           | 1.7571         | 2.59                | 0.088 | 4.50           | 1.7858         | 2.60                | 0.057 |
| Ag   | 3               | O  | -2              | 4   | 0.444         | 1.8285         | 5.50                | 0.159 | 4.75           | 1.8675         | 2.71                | 0.238 | 4.75           | 1.8991         | 2.73                | 0.184 |
| Al   | 3               | As | -3              | 9   | 0.495         | 2.3664         | 6.50                | 0.141 | 3.89           | 2.3710         | 3.22                | 0.137 | 3.89           | 2.4026         | 3.16                | 0.172 |
| Al   | 3               | Br | -1              | 9   | 0.687         | 2.0404         | 7.00                | 0.046 | 4.00           | 2.0961         | 3.29                | 0.049 | 4.00           | 2.1850         | 2.95                | 0.096 |
| Al   | 3               | Cl | -1              | 33  | 0.646         | 1.8961         | 6.50                | 0.037 | 4.00           | 1.9493         | 3.07                | 0.044 | 4.00           | 2.0280         | 2.80                | 0.076 |
| Al   | 3               | F  | -1              | 82  | 0.519         | 1.4197         | 5.50                | 0.061 | 6.00           | 1.4415         | 2.55                | 0.056 | 6.00           | 1.5442         | 2.46                | 0.081 |
| Al   | 3               | H  | -1              | 1   | 0.543         | 1.2507         | 5.50                | 0.000 | 6.00           | 1.3326         | 2.49                | 0.000 | 6.00           | 1.4525         | 2.37                | 0.000 |
| Al   | 3               | I  | -1              | 5   | 0.747         | 2.2465         | 7.00                | 0.059 | 4.00           | 2.3244         | 3.62                | 0.040 | 4.00           | 2.4313         | 3.20                | 0.066 |
| Al   | 3               | N  | -3              | 9   | 0.511         | 1.6908         | 6.00                | 0.049 | 4.00           | 1.7174         | 2.60                | 0.129 | 4.00           | 1.7577         | 2.53                | 0.178 |
| Al   | 3               | O  | -2              | 104 | 0.424         | 1.5990         | 5.00                | 0.101 | 5.33           | 1.6161         | 2.47                | 0.116 | 5.33           | 1.6457         | 2.52                | 0.144 |
| Al   | 3               | P  | -3              | 10  | 0.424         | 2.3055         | 6.00                | 0.072 | 3.60           | 2.3067         | 3.00                | 0.070 | 3.60           | 2.3158         | 3.05                | 0.099 |
| Al   | 3               | Sb | -3              | 5   | 0.296         | 2.6398         | 5.00                | 0.124 | 3.40           | 2.6399         | 3.11                | 0.124 | 3.40           | 2.6312         | 3.34                | 0.149 |
| Al   | 3               | Se | -2              | 14  | 0.582         | 2.1739         | 6.50                | 0.063 | 4.00           | 2.2119         | 3.22                | 0.061 | 4.00           | 2.2726         | 3.04                | 0.093 |

|    |   |    |    |     |       |        |      |       |       |        |      |       |       |        |      |       |
|----|---|----|----|-----|-------|--------|------|-------|-------|--------|------|-------|-------|--------|------|-------|
| Al | 3 | S  | -2 | 39  | 0.550 | 2.0596 | 6.00 | 0.038 | 4.08  | 2.0945 | 3.06 | 0.046 | 4.08  | 2.1482 | 2.92 | 0.096 |
| Al | 3 | Te | -2 | 10  | 0.632 | 2.3866 | 7.00 | 0.070 | 4.00  | 2.4310 | 3.53 | 0.071 | 4.00  | 2.5057 | 3.28 | 0.120 |
| As | 3 | Cl | -1 | 4   | 0.522 | 2.0618 | 6.00 | 0.184 | 3.00  | 2.1083 | 2.86 | 0.203 | 3.00  | 2.1077 | 2.77 | 0.284 |
| As | 3 | F  | -1 | 5   | 0.406 | 1.6830 | 5.00 | 0.054 | 3.20  | 1.7156 | 2.33 | 0.106 | 3.40  | 1.7130 | 2.42 | 0.083 |
| As | 3 | O  | -2 | 29  | 0.404 | 1.7671 | 5.00 | 0.066 | 3.00  | 1.7894 | 2.37 | 0.109 | 3.00  | 1.7893 | 2.45 | 0.118 |
| As | 3 | Se | -2 | 15  | 0.571 | 2.3403 | 6.50 | 0.063 | 3.07  | 2.4022 | 3.24 | 0.073 | 3.00  | 2.4032 | 3.07 | 0.175 |
| As | 3 | S  | -2 | 50  | 0.540 | 2.2084 | 6.00 | 0.076 | 3.20  | 2.2624 | 3.08 | 0.114 | 3.06  | 2.2694 | 2.94 | 0.159 |
| As | 3 | Te | -2 | 5   | 0.616 | 2.4881 | 7.00 | 0.026 | 5.80  | 2.5319 | 3.83 | 0.069 | 5.80  | 2.6717 | 3.58 | 0.083 |
| As | 5 | F  | -1 | 6   | 0.503 | 1.6038 | 6.00 | 0.070 | 6.00  | 1.6163 | 2.44 | 0.088 | 6.00  | 1.6402 | 2.37 | 0.120 |
| As | 5 | O  | -2 | 137 | 0.411 | 1.7669 | 5.00 | 0.078 | 4.02  | 1.7793 | 2.28 | 0.102 | 4.04  | 1.7699 | 2.35 | 0.091 |
| As | 5 | S  | -2 | 6   | 0.534 | 2.2799 | 6.50 | 0.039 | 4.00  | 2.2897 | 2.94 | 0.070 | 4.00  | 2.2530 | 2.83 | 0.101 |
| Au | 1 | O  | -2 | 4   | 0.441 | 1.7182 | 5.50 | 0.043 | 2.00  | 1.7263 | 2.67 | 0.041 | 2.00  | 1.7755 | 2.69 | 0.048 |
| Au | 1 | Se | -2 | 7   | 0.346 | 2.1761 | 4.00 | 0.047 | 2.00  | 2.1836 | 2.92 | 0.038 | 2.00  | 2.1670 | 3.09 | 0.036 |
| Au | 1 | S  | -2 | 13  | 0.342 | 2.0640 | 4.50 | 0.034 | 2.00  | 2.0685 | 2.80 | 0.030 | 2.00  | 2.0491 | 2.97 | 0.028 |
| Au | 3 | Br | -1 | 7   | 0.461 | 2.2791 | 5.50 | 0.028 | 4.00  | 2.2942 | 3.09 | 0.037 | 4.00  | 2.3203 | 3.09 | 0.046 |
| Au | 3 | Cl | -1 | 17  | 0.421 | 2.1452 | 5.50 | 0.029 | 4.00  | 2.1591 | 2.89 | 0.052 | 4.00  | 2.1736 | 2.94 | 0.059 |
| Au | 3 | F  | -1 | 36  | 0.507 | 1.6970 | 5.50 | 0.068 | 4.00  | 1.7665 | 2.65 | 0.072 | 4.00  | 1.8056 | 2.58 | 0.097 |
| Au | 3 | O  | -2 | 11  | 0.498 | 1.8176 | 5.50 | 0.096 | 4.00  | 1.8577 | 2.72 | 0.105 | 4.00  | 1.8944 | 2.66 | 0.140 |
| B  | 3 | As | -3 | 3   | 0.566 | 2.0965 | 6.50 | 0.037 | 2.00  | 2.1001 | 2.69 | 0.032 | 2.00  | 2.0206 | 2.53 | 0.049 |
| B  | 3 | F  | -1 | 19  | 0.542 | 1.2004 | 5.00 | 0.050 | 4.00  | 1.2282 | 2.17 | 0.061 | 4.00  | 1.2774 | 2.05 | 0.092 |
| B  | 3 | H  | -1 | 1   | 0.565 | 0.9866 | 5.50 | 0.000 | 4.00  | 1.0503 | 2.03 | 0.000 | 4.00  | 1.1057 | 1.88 | 0.000 |
| B  | 3 | N  | -3 | 11  | 0.301 | 1.4568 | 4.00 | 0.086 | 2.55  | 1.4587 | 1.84 | 0.090 | 2.55  | 1.4720 | 2.07 | 0.145 |
| B  | 3 | O  | -2 | 315 | 0.385 | 1.3578 | 4.50 | 0.057 | 3.41  | 1.3681 | 1.97 | 0.061 | 3.41  | 1.3699 | 2.08 | 0.061 |
| B  | 3 | P  | -3 | 8   | 0.284 | 1.8845 | 5.00 | 0.023 | 2.50  | 1.8849 | 2.24 | 0.024 | 2.50  | 1.9040 | 2.50 | 0.214 |
| B  | 3 | S  | -2 | 13  | 0.573 | 1.7819 | 6.00 | 0.074 | 3.00  | 1.8104 | 2.64 | 0.061 | 3.00  | 1.8101 | 2.47 | 0.095 |
| Ba | 2 | As | -3 | 10  | 0.674 | 2.6084 | 8.00 | 0.089 | 6.20  | 2.6411 | 4.38 | 0.097 | 6.00  | 2.9775 | 4.05 | 0.138 |
| Ba | 2 | Br | -1 | 7   | 0.595 | 2.4688 | 7.00 | 0.042 | 8.57  | 2.4892 | 4.22 | 0.045 | 8.57  | 2.8083 | 4.01 | 0.069 |
| Ba | 2 | Cl | -1 | 5   | 0.519 | 2.4104 | 6.50 | 0.021 | 9.60  | 2.4231 | 3.99 | 0.035 | 9.00  | 2.6504 | 3.87 | 0.058 |
| Ba | 2 | F  | -1 | 71  | 0.428 | 2.0648 | 6.00 | 0.093 | 11.31 | 2.0793 | 3.44 | 0.097 | 11.34 | 2.1745 | 3.48 | 0.105 |
| Ba | 2 | H  | -1 | 6   | 0.641 | 1.6245 | 6.00 | 0.073 | 12.33 | 1.6765 | 3.77 | 0.052 | 12.17 | 2.1596 | 3.49 | 0.103 |

|    |   |    |    |     |       |        |      |       |      |        |      |       |      |        |      |       |
|----|---|----|----|-----|-------|--------|------|-------|------|--------|------|-------|------|--------|------|-------|
| Ba | 2 | I  | -1 | 10  | 0.655 | 2.6138 | 7.50 | 0.103 | 8.60 | 2.6424 | 4.55 | 0.107 | 8.50 | 3.0457 | 4.24 | 0.230 |
| Ba | 2 | N  | -3 | 34  | 0.525 | 2.2680 | 6.50 | 0.127 | 6.97 | 2.2976 | 3.71 | 0.139 | 6.85 | 2.4767 | 3.60 | 0.171 |
| Ba | 2 | O  | -2 | 103 | 0.437 | 2.1600 | 6.00 | 0.158 | 9.87 | 2.1758 | 3.51 | 0.174 | 9.95 | 2.2762 | 3.53 | 0.176 |
| Ba | 2 | P  | -3 | 18  | 0.644 | 2.5673 | 7.50 | 0.129 | 6.22 | 2.5975 | 4.26 | 0.125 | 6.22 | 2.9046 | 3.99 | 0.175 |
| Ba | 2 | Sb | -3 | 8   | 0.749 | 2.6859 | 8.50 | 0.120 | 6.00 | 2.7317 | 4.64 | 0.115 | 6.00 | 3.1441 | 4.21 | 0.226 |
| Ba | 2 | Se | -2 | 17  | 0.604 | 2.5198 | 7.00 | 0.080 | 8.29 | 2.5427 | 4.28 | 0.092 | 8.06 | 2.8663 | 4.04 | 0.130 |
| Ba | 2 | S  | -2 | 37  | 0.573 | 2.4424 | 7.00 | 0.132 | 8.97 | 2.4610 | 4.15 | 0.135 | 8.84 | 2.7553 | 3.97 | 0.200 |
| Ba | 2 | Te | -2 | 5   | 0.649 | 2.6881 | 7.00 | 0.033 | 7.40 | 2.7112 | 4.50 | 0.049 | 7.40 | 3.0637 | 4.21 | 0.186 |
| Be | 2 | As | -3 | 3   | 0.379 | 2.0569 | 8.00 | 0.027 | 3.00 | 2.0586 | 2.76 | 0.028 | 3.00 | 2.0619 | 2.87 | 0.034 |
| Be | 2 | Cl | -1 | 2   | 0.659 | 1.5273 | 6.50 | 0.083 | 4.00 | 1.5654 | 2.98 | 0.016 | 4.00 | 1.7655 | 2.68 | 0.027 |
| Be | 2 | F  | -1 | 34  | 0.532 | 1.1499 | 5.50 | 0.058 | 3.97 | 1.1802 | 2.31 | 0.076 | 3.97 | 1.2895 | 2.21 | 0.096 |
| Be | 2 | N  | -3 | 5   | 0.629 | 1.3123 | 6.00 | 0.035 | 3.00 | 1.3529 | 2.52 | 0.084 | 3.00 | 1.4571 | 2.27 | 0.140 |
| Be | 2 | O  | -2 | 37  | 0.541 | 1.2090 | 5.50 | 0.049 | 4.00 | 1.2608 | 2.42 | 0.053 | 4.00 | 1.3785 | 2.30 | 0.077 |
| Be | 2 | Sb | -3 | 2   | 0.479 | 2.1921 | 6.00 | 0.000 | 3.50 | 2.2015 | 3.16 | 0.014 | 3.50 | 2.2605 | 3.13 | 0.101 |
| Bi | 3 | Br | -1 | 3   | 0.545 | 2.4671 | 7.00 | 0.019 | 6.00 | 2.4856 | 3.65 | 0.123 | 6.00 | 2.5950 | 3.51 | 0.050 |
| Bi | 3 | Cl | -1 | 6   | 0.505 | 2.3411 | 6.00 | 0.058 | 6.33 | 2.3486 | 3.46 | 0.059 | 6.00 | 2.4400 | 3.36 | 0.084 |
| Bi | 3 | F  | -1 | 10  | 0.423 | 1.9305 | 5.50 | 0.101 | 7.10 | 1.9345 | 2.91 | 0.107 | 7.10 | 1.9774 | 2.96 | 0.145 |
| Bi | 3 | I  | -1 | 8   | 0.605 | 2.6399 | 7.50 | 0.035 | 6.00 | 2.6613 | 3.96 | 0.059 | 6.00 | 2.8208 | 3.74 | 0.134 |
| Bi | 3 | O  | -2 | 86  | 0.414 | 2.0368 | 5.50 | 0.105 | 6.05 | 2.0586 | 2.95 | 0.146 | 6.09 | 2.0824 | 3.01 | 0.177 |
| Bi | 3 | Se | -2 | 19  | 0.554 | 2.5455 | 7.00 | 0.054 | 6.11 | 2.5630 | 3.76 | 0.048 | 6.11 | 2.6826 | 3.61 | 0.077 |
| Bi | 3 | S  | -2 | 12  | 0.523 | 2.4182 | 6.50 | 0.030 | 7.25 | 2.4411 | 3.66 | 0.060 | 7.00 | 2.5526 | 3.53 | 0.085 |
| Bi | 3 | Te | -2 | 2   | 0.599 | 2.8230 | 7.00 | 0.032 | 4.50 | 2.8569 | 3.97 | 0.128 | 4.50 | 2.9329 | 3.75 | 0.433 |
| Bi | 5 | F  | -1 | 3   | 0.448 | 1.8698 | 5.50 | 0.088 | 6.00 | 1.8815 | 2.61 | 0.088 | 6.00 | 1.8948 | 2.63 | 0.108 |
| Bi | 5 | O  | -2 | 6   | 0.371 | 2.0450 | 5.00 | 0.109 | 6.00 | 2.0475 | 2.65 | 0.089 | 6.00 | 2.0476 | 2.78 | 0.090 |
| Bk | 3 | O  | -2 | 3   | 0.430 | 2.0307 | 6.00 | 0.020 | 6.67 | 2.0448 | 3.01 | 0.033 | 6.67 | 2.0891 | 3.05 | 0.018 |
| Br | 5 | F  | -1 | 1   | 0.370 | 1.7848 | 7.00 | 0.000 | 6.00 | 1.7865 | 2.39 | 0.000 | 6.00 | 1.7865 | 2.52 | 0.000 |
| Br | 5 | O  | -2 | 25  | 0.444 | 1.8509 | 5.50 | 0.054 | 3.00 | 1.8796 | 2.30 | 0.058 | 3.00 | 1.8418 | 2.32 | 0.070 |
| Br | 7 | O  | -2 | 7   | 0.423 | 1.8368 | 5.50 | 0.031 | 4.00 | 1.8426 | 2.22 | 0.051 | 4.00 | 1.8129 | 2.27 | 0.059 |
| C  | 2 | F  | -1 | 3   | 0.407 | 1.1591 | 6.00 | 0.037 | 3.00 | 1.1842 | 1.94 | 0.030 | 3.00 | 1.1992 | 2.01 | 0.033 |
| C  | 2 | O  | -2 | 386 | 0.415 | 1.4137 | 5.00 | 0.070 | 1.00 | 1.4250 | 1.74 | 0.070 | 1.00 | 1.3938 | 1.80 | 0.079 |

|    |   |    |    |     |       |        |      |       |       |        |      |       |       |        |      |       |
|----|---|----|----|-----|-------|--------|------|-------|-------|--------|------|-------|-------|--------|------|-------|
| C  | 4 | F  | -1 | 3   | 0.547 | 1.3725 | 6.00 | 0.052 | 3.00  | 1.4458 | 2.08 | 0.085 | 3.00  | 1.3947 | 1.95 | 0.126 |
| C  | 4 | N  | -3 | 12  | 0.529 | 1.5579 | 6.00 | 0.079 | 2.00  | 1.5885 | 1.99 | 0.100 | 2.00  | 1.4774 | 1.88 | 0.144 |
| C  | 4 | O  | -2 | 73  | 0.447 | 1.3983 | 5.00 | 0.044 | 3.00  | 1.4113 | 1.93 | 0.038 | 3.00  | 1.3891 | 1.95 | 0.046 |
| C  | 4 | S  | -2 | 4   | 0.579 | 1.8435 | 6.00 | 0.068 | 3.00  | 1.8739 | 2.55 | 0.035 | 3.00  | 1.8130 | 2.37 | 0.059 |
| Ca | 2 | As | -3 | 13  | 0.713 | 2.2057 | 8.00 | 0.039 | 6.00  | 2.2648 | 4.08 | 0.034 | 5.85  | 2.6352 | 3.70 | 0.059 |
| Ca | 2 | Cl | -1 | 2   | 0.594 | 2.0626 | 6.50 | 0.000 | 6.00  | 2.0914 | 3.60 | 0.000 | 6.00  | 2.3370 | 3.41 | 0.000 |
| Ca | 2 | F  | -1 | 19  | 0.467 | 1.7104 | 5.50 | 0.075 | 6.89  | 1.7369 | 2.99 | 0.104 | 6.89  | 1.8551 | 2.98 | 0.112 |
| Ca | 2 | H  | -1 | 5   | 0.490 | 1.6066 | 5.50 | 0.128 | 10.20 | 1.6357 | 3.14 | 0.137 | 10.20 | 1.8271 | 3.09 | 0.142 |
| Ca | 2 | N  | -3 | 12  | 0.564 | 1.9698 | 6.50 | 0.108 | 5.17  | 2.0128 | 3.36 | 0.112 | 5.17  | 2.1910 | 3.21 | 0.095 |
| Ca | 2 | O  | -2 | 125 | 0.476 | 1.7952 | 5.50 | 0.115 | 7.55  | 1.8279 | 3.15 | 0.112 | 7.54  | 1.9625 | 3.12 | 0.131 |
| Ca | 2 | P  | -3 | 8   | 0.684 | 2.1950 | 7.50 | 0.118 | 6.00  | 2.2442 | 3.99 | 0.110 | 5.88  | 2.5814 | 3.64 | 0.183 |
| Ca | 2 | Sb | -3 | 6   | 0.788 | 2.3144 | 8.00 | 0.073 | 6.00  | 2.3827 | 4.39 | 0.067 | 5.83  | 2.8359 | 3.89 | 0.141 |
| Ca | 2 | Se | -2 | 4   | 0.643 | 2.2028 | 7.00 | 0.051 | 7.00  | 2.2389 | 3.97 | 0.058 | 7.00  | 2.5764 | 3.70 | 0.187 |
| Ca | 2 | S  | -2 | 20  | 0.612 | 2.1115 | 7.00 | 0.095 | 7.20  | 2.1527 | 3.82 | 0.087 | 7.20  | 2.4570 | 3.59 | 0.178 |
| Cd | 2 | As | -3 | 9   | 0.400 | 2.4246 | 7.50 | 0.221 | 3.78  | 2.4285 | 3.26 | 0.212 | 3.78  | 2.4469 | 3.35 | 0.218 |
| Cd | 2 | Br | -1 | 11  | 0.553 | 2.1691 | 6.00 | 0.062 | 5.27  | 2.1781 | 3.51 | 0.035 | 5.27  | 2.3499 | 3.37 | 0.194 |
| Cd | 2 | Cl | -1 | 8   | 0.512 | 2.0695 | 6.00 | 0.048 | 6.00  | 2.0779 | 3.38 | 0.048 | 6.00  | 2.2331 | 3.30 | 0.068 |
| Cd | 2 | F  | -1 | 16  | 0.416 | 1.7395 | 5.50 | 0.036 | 6.81  | 1.7532 | 2.86 | 0.046 | 6.81  | 1.8085 | 2.92 | 0.061 |
| Cd | 2 | I  | -1 | 9   | 0.613 | 2.3244 | 7.00 | 0.042 | 5.44  | 2.3371 | 3.84 | 0.034 | 5.33  | 2.5635 | 3.59 | 0.173 |
| Cd | 2 | O  | -2 | 90  | 0.407 | 1.8393 | 5.50 | 0.093 | 6.22  | 1.8609 | 2.91 | 0.101 | 6.33  | 1.9003 | 2.99 | 0.107 |
| Cd | 2 | P  | -3 | 9   | 0.370 | 2.3533 | 7.50 | 0.277 | 3.56  | 2.3562 | 3.10 | 0.267 | 3.56  | 2.3562 | 3.23 | 0.267 |
| Cd | 2 | Se | -2 | 7   | 0.561 | 2.1621 | 6.50 | 0.109 | 4.00  | 2.2156 | 3.42 | 0.081 | 4.00  | 2.3477 | 3.27 | 0.123 |
| Cd | 2 | S  | -2 | 23  | 0.531 | 2.1279 | 5.50 | 0.041 | 4.43  | 2.1688 | 3.36 | 0.057 | 4.30  | 2.2928 | 3.24 | 0.080 |
| Cd | 2 | Te | -2 | 5   | 0.607 | 2.3668 | 7.00 | 0.142 | 4.00  | 2.4000 | 3.70 | 0.117 | 4.00  | 2.5628 | 3.48 | 0.188 |
| Ce | 3 | F  | -1 | 4   | 0.458 | 1.9266 | 5.50 | 0.064 | 9.75  | 1.9387 | 3.14 | 0.058 | 9.75  | 2.0375 | 3.14 | 0.056 |
| Ce | 3 | O  | -2 | 34  | 0.449 | 2.0312 | 5.50 | 0.081 | 9.06  | 2.0485 | 3.19 | 0.093 | 9.06  | 2.1315 | 3.20 | 0.130 |
| Ce | 3 | Se | -2 | 1   | 0.520 | 2.5266 | 7.00 | 0.000 | 9.00  | 2.5422 | 3.87 | 0.000 | 9.00  | 2.7059 | 3.78 | 0.000 |
| Ce | 3 | S  | -2 | 3   | 0.489 | 2.5040 | 6.00 | 0.120 | 7.33  | 2.5185 | 3.66 | 0.084 | 7.33  | 2.6178 | 3.61 | 0.019 |
| Ce | 4 | O  | -2 | 15  | 0.443 | 2.0253 | 5.50 | 0.059 | 8.00  | 2.0379 | 2.99 | 0.080 | 8.00  | 2.0863 | 3.01 | 0.143 |
| Cl | 5 | O  | -2 | 11  | 0.445 | 1.6955 | 5.50 | 0.040 | 3.00  | 1.7109 | 2.13 | 0.059 | 3.00  | 1.6726 | 2.15 | 0.071 |

|    |   |    |    |     |       |        |      |       |      |        |      |       |      |        |      |       |
|----|---|----|----|-----|-------|--------|------|-------|------|--------|------|-------|------|--------|------|-------|
| Cl | 7 | O  | -2 | 20  | 0.443 | 1.6795 | 5.00 | 0.084 | 4.00 | 1.6865 | 2.08 | 0.095 | 4.00 | 1.6453 | 2.10 | 0.107 |
| Co | 1 | O  | -2 | 5   | 0.621 | 1.2950 | 5.50 | 0.014 | 2.00 | 1.3186 | 2.65 | 0.010 | 2.00 | 1.4925 | 2.41 | 0.017 |
| Co | 2 | Cl | -1 | 16  | 0.468 | 1.9314 | 5.50 | 0.048 | 4.63 | 1.9360 | 3.01 | 0.054 | 4.63 | 2.0155 | 2.99 | 0.143 |
| Co | 2 | F  | -1 | 30  | 0.460 | 1.5144 | 5.50 | 0.095 | 6.00 | 1.5291 | 2.70 | 0.078 | 6.00 | 1.6277 | 2.70 | 0.097 |
| Co | 2 | I  | -1 | 2   | 0.569 | 2.1984 | 6.00 | 0.002 | 4.00 | 2.2038 | 3.42 | 0.004 | 4.00 | 2.3417 | 3.26 | 0.005 |
| Co | 2 | O  | -2 | 166 | 0.451 | 1.5977 | 5.50 | 0.112 | 5.51 | 1.6238 | 2.73 | 0.110 | 5.51 | 1.7034 | 2.74 | 0.109 |
| Co | 2 | P  | -3 | 4   | 0.734 | 1.6236 | 7.50 | 0.043 | 4.00 | 1.7444 | 3.32 | 0.054 | 4.00 | 1.9960 | 2.92 | 0.104 |
| Co | 2 | Se | -2 | 5   | 0.518 | 2.1095 | 6.00 | 0.034 | 4.00 | 2.1135 | 3.22 | 0.036 | 4.00 | 2.2158 | 3.14 | 0.049 |
| Co | 2 | S  | -2 | 8   | 0.487 | 2.0005 | 5.50 | 0.057 | 4.00 | 2.0052 | 3.05 | 0.049 | 4.00 | 2.0862 | 3.01 | 0.065 |
| Co | 3 | F  | -1 | 5   | 0.443 | 1.5635 | 5.50 | 0.068 | 6.00 | 1.5732 | 2.52 | 0.057 | 6.00 | 1.6238 | 2.54 | 0.068 |
| Co | 3 | O  | -2 | 12  | 0.434 | 1.5946 | 5.50 | 0.119 | 6.00 | 1.6090 | 2.54 | 0.118 | 6.00 | 1.6532 | 2.57 | 0.136 |
| Co | 4 | O  | -2 | 5   | 0.441 | 1.7944 | 5.50 | 0.096 | 4.00 | 1.7983 | 2.44 | 0.101 | 4.00 | 1.7981 | 2.46 | 0.119 |
| Cr | 2 | Br | -1 | 2   | 0.480 | 2.1268 | 6.00 | 0.038 | 6.00 | 2.1325 | 3.35 | 0.023 | 6.00 | 2.2467 | 3.32 | 0.048 |
| Cr | 2 | Cl | -1 | 6   | 0.439 | 2.0150 | 5.50 | 0.031 | 6.00 | 2.0194 | 3.14 | 0.027 | 6.00 | 2.0892 | 3.16 | 0.038 |
| Cr | 2 | F  | -1 | 11  | 0.489 | 1.5410 | 5.50 | 0.048 | 5.64 | 1.5759 | 2.79 | 0.126 | 5.64 | 1.6903 | 2.74 | 0.092 |
| Cr | 2 | I  | -1 | 4   | 0.540 | 2.2840 | 6.50 | 0.011 | 6.00 | 2.2884 | 3.66 | 0.012 | 6.00 | 2.4680 | 3.54 | 0.028 |
| Cr | 2 | O  | -2 | 15  | 0.480 | 1.5936 | 5.50 | 0.072 | 5.60 | 1.6328 | 2.82 | 0.072 | 5.60 | 1.7381 | 2.78 | 0.072 |
| Cr | 2 | S  | -2 | 3   | 0.458 | 1.9093 | 5.50 | 0.149 | 6.00 | 1.9207 | 3.09 | 0.139 | 6.00 | 2.0163 | 3.09 | 0.167 |
| Cr | 2 | Te | -2 | 4   | 0.534 | 2.1826 | 6.50 | 0.031 | 6.00 | 2.1972 | 3.56 | 0.024 | 6.00 | 2.3772 | 3.45 | 0.035 |
| Cr | 3 | Br | -1 | 5   | 0.530 | 2.1316 | 6.50 | 0.034 | 6.00 | 2.1499 | 3.28 | 0.076 | 6.00 | 2.2602 | 3.18 | 0.118 |
| Cr | 3 | Cl | -1 | 5   | 0.489 | 2.0051 | 5.50 | 0.048 | 6.00 | 2.0120 | 3.06 | 0.038 | 6.00 | 2.0940 | 3.01 | 0.054 |
| Cr | 3 | F  | -1 | 50  | 0.438 | 1.5897 | 5.50 | 0.043 | 6.00 | 1.5986 | 2.54 | 0.036 | 6.00 | 1.6456 | 2.56 | 0.043 |
| Cr | 3 | O  | -2 | 55  | 0.430 | 1.6620 | 5.50 | 0.071 | 6.00 | 1.6777 | 2.60 | 0.067 | 6.00 | 1.7190 | 2.64 | 0.077 |
| Cr | 3 | Se | -2 | 13  | 0.539 | 2.1465 | 6.00 | 0.057 | 6.00 | 2.1675 | 3.32 | 0.047 | 6.00 | 2.2839 | 3.20 | 0.071 |
| Cr | 3 | S  | -2 | 36  | 0.508 | 2.0440 | 5.50 | 0.038 | 6.00 | 2.0640 | 3.15 | 0.036 | 6.00 | 2.1589 | 3.08 | 0.051 |
| Cr | 3 | Te | -2 | 3   | 0.584 | 2.3024 | 6.50 | 0.030 | 6.00 | 2.3269 | 3.58 | 0.037 | 6.00 | 2.4752 | 3.39 | 0.058 |
| Cr | 4 | F  | -1 | 7   | 0.418 | 1.6490 | 5.00 | 0.149 | 6.00 | 1.6569 | 2.43 | 0.150 | 6.00 | 1.6758 | 2.49 | 0.173 |
| Cr | 4 | O  | -2 | 7   | 0.409 | 1.7609 | 5.50 | 0.076 | 5.43 | 1.7675 | 2.48 | 0.064 | 5.43 | 1.7785 | 2.55 | 0.136 |
| Cr | 5 | O  | -2 | 3   | 0.402 | 1.7678 | 5.50 | 0.142 | 4.00 | 1.7764 | 2.27 | 0.148 | 4.00 | 1.7690 | 2.35 | 0.164 |
| Cr | 6 | N  | -3 | 2   | 0.605 | 1.9686 | 6.50 | 0.027 | 4.00 | 2.0077 | 2.64 | 0.074 | 4.00 | 1.9123 | 2.43 | 0.122 |

|    |   |                  |    |     |       |        |      |       |       |        |      |       |       |        |      |       |
|----|---|------------------|----|-----|-------|--------|------|-------|-------|--------|------|-------|-------|--------|------|-------|
| Cr | 6 | O                | -2 | 99  | 0.476 | 1.8247 | 5.50 | 0.088 | 4.00  | 1.8414 | 2.34 | 0.103 | 4.00  | 1.7974 | 2.31 | 0.133 |
| Cr | 6 | Te               | -2 | 2   | 0.729 | 2.6086 | 8.00 | 0.011 | 6.00  | 2.7287 | 3.78 | 0.069 | 6.00  | 2.7285 | 3.39 | 0.134 |
| Cs | 1 | As               | -3 | 24  | 0.619 | 2.7643 | 7.50 | 0.080 | 5.29  | 2.7812 | 4.71 | 0.079 | 5.08  | 3.1787 | 4.44 | 0.137 |
| Cs | 1 | Br               | -1 | 39  | 0.541 | 2.5082 | 7.00 | 0.063 | 10.31 | 2.5152 | 4.56 | 0.062 | 10.28 | 2.9025 | 4.43 | 0.111 |
| Cs | 1 | Cl               | -1 | 78  | 0.500 | 2.4604 | 6.50 | 0.095 | 10.33 | 2.4669 | 4.36 | 0.094 | 10.29 | 2.7635 | 4.29 | 0.111 |
| Cs | 1 | F                | -1 | 51  | 0.428 | 2.1532 | 6.00 | 0.056 | 11.55 | 2.1666 | 3.83 | 0.054 | 11.55 | 2.3040 | 3.87 | 0.056 |
| Cs | 1 | H                | -1 | 5   | 0.404 | 2.2466 | 6.00 | 0.084 | 8.80  | 2.2516 | 3.71 | 0.085 | 8.80  | 2.3250 | 3.79 | 0.088 |
| Cs | 1 | I                | -1 | 31  | 0.601 | 2.7119 | 8.00 | 0.041 | 10.48 | 2.7241 | 5.01 | 0.047 | 10.42 | 3.2552 | 4.79 | 0.105 |
| Cs | 1 | N                | -3 | 4   | 0.471 | 2.4310 | 6.00 | 0.036 | 11.00 | 2.4436 | 4.25 | 0.021 | 11.00 | 2.6775 | 4.23 | 0.025 |
| Cs | 1 | Nx <sup>#1</sup> | -3 | 19  | 0.471 | 2.5621 | 6.00 | 0.099 | 10.89 | 2.5656 | 4.37 | 0.092 | 10.89 | 2.7956 | 4.34 | 0.182 |
| Cs | 1 | O                | -2 | 38  | 0.419 | 2.2590 | 6.50 | 0.078 | 11.50 | 2.2758 | 3.91 | 0.080 | 11.63 | 2.3883 | 3.96 | 0.080 |
| Cs | 1 | P                | -3 | 18  | 0.590 | 2.7298 | 7.00 | 0.032 | 4.94  | 2.7449 | 4.54 | 0.036 | 4.89  | 3.0818 | 4.33 | 0.079 |
| Cs | 1 | Sb               | -3 | 7   | 0.694 | 2.9184 | 8.00 | 0.047 | 5.14  | 2.9446 | 5.09 | 0.052 | 5.14  | 3.4646 | 4.73 | 0.097 |
| Cs | 1 | Se               | -2 | 37  | 0.550 | 2.6486 | 7.00 | 0.079 | 7.27  | 2.6661 | 4.56 | 0.081 | 7.16  | 3.0110 | 4.40 | 0.102 |
| Cs | 1 | S                | -2 | 41  | 0.519 | 2.5228 | 6.50 | 0.064 | 7.56  | 2.5396 | 4.34 | 0.061 | 7.41  | 2.8328 | 4.24 | 0.095 |
| Cs | 1 | Te               | -2 | 6   | 0.595 | 2.7823 | 7.50 | 0.077 | 7.50  | 2.7920 | 4.85 | 0.080 | 7.00  | 3.2257 | 4.61 | 0.099 |
| Cu | 1 | Br               | -1 | 10  | 0.442 | 1.8681 | 5.50 | 0.045 | 3.80  | 1.8773 | 3.11 | 0.044 | 3.80  | 1.9724 | 3.13 | 0.047 |
| Cu | 1 | Cl               | -1 | 14  | 0.402 | 1.7982 | 5.00 | 0.028 | 3.86  | 1.8066 | 2.93 | 0.028 | 3.86  | 1.8490 | 3.01 | 0.029 |
| Cu | 1 | I                | -1 | 13  | 0.503 | 1.9307 | 6.00 | 0.044 | 3.92  | 1.9441 | 3.36 | 0.044 | 3.85  | 2.1246 | 3.29 | 0.049 |
| Cu | 1 | O                | -2 | 82  | 0.341 | 1.5873 | 5.00 | 0.073 | 2.48  | 1.6084 | 2.41 | 0.087 | 2.61  | 1.5768 | 2.62 | 0.078 |
| Cu | 1 | P                | -3 | 13  | 0.402 | 1.9275 | 6.50 | 0.077 | 3.08  | 1.9377 | 2.97 | 0.083 | 3.15  | 1.9706 | 3.06 | 0.077 |
| Cu | 1 | Se               | -2 | 19  | 0.451 | 1.8956 | 5.50 | 0.068 | 3.74  | 1.9094 | 3.16 | 0.071 | 3.74  | 2.0126 | 3.16 | 0.074 |
| Cu | 1 | S                | -2 | 104 | 0.420 | 1.8074 | 5.00 | 0.089 | 3.35  | 1.8225 | 2.94 | 0.100 | 3.36  | 1.8819 | 2.99 | 0.096 |
| Cu | 1 | Te               | -2 | 15  | 0.497 | 1.8898 | 6.00 | 0.039 | 4.00  | 1.9020 | 3.31 | 0.044 | 4.00  | 2.0779 | 3.25 | 0.059 |
| Cu | 2 | Cl               | -1 | 13  | 0.470 | 1.9018 | 5.50 | 0.054 | 5.62  | 1.9069 | 3.07 | 0.061 | 5.62  | 1.9989 | 3.04 | 0.090 |
| Cu | 2 | F                | -1 | 74  | 0.457 | 1.4953 | 5.50 | 0.076 | 5.84  | 1.5124 | 2.66 | 0.092 | 5.84  | 1.6006 | 2.66 | 0.093 |
| Cu | 2 | O                | -2 | 310 | 0.449 | 1.5742 | 5.00 | 0.067 | 5.09  | 1.6015 | 2.67 | 0.089 | 5.10  | 1.6703 | 2.68 | 0.079 |
| Cu | 2 | Se               | -2 | 4   | 0.519 | 2.0289 | 6.00 | 0.040 | 4.00  | 2.0577 | 3.17 | 0.031 | 4.00  | 2.1609 | 3.08 | 0.044 |
| Cu | 2 | S                | -2 | 25  | 0.488 | 1.9500 | 6.00 | 0.090 | 3.88  | 1.9783 | 3.01 | 0.083 | 3.88  | 2.0556 | 2.96 | 0.107 |
| Cu | 3 | F                | -1 | 3   | 0.437 | 1.5427 | 5.50 | 0.210 | 6.00  | 1.5463 | 2.48 | 0.229 | 6.00  | 1.5925 | 2.51 | 0.269 |

|    |   |    |    |     |       |        |      |       |       |        |      |       |       |        |      |       |
|----|---|----|----|-----|-------|--------|------|-------|-------|--------|------|-------|-------|--------|------|-------|
| Cu | 3 | O  | -2 | 11  | 0.427 | 1.7096 | 5.00 | 0.063 | 4.00  | 1.7177 | 2.46 | 0.057 | 4.00  | 1.7340 | 2.50 | 0.066 |
| Dy | 3 | Cl | -1 | 6   | 0.493 | 2.2881 | 6.00 | 0.046 | 7.00  | 2.2941 | 3.43 | 0.044 | 7.00  | 2.3969 | 3.37 | 0.107 |
| Dy | 3 | O  | -2 | 29  | 0.426 | 1.9603 | 5.50 | 0.095 | 7.62  | 1.9732 | 2.99 | 0.096 | 7.62  | 2.0238 | 3.03 | 0.113 |
| Dy | 3 | S  | -2 | 7   | 0.512 | 2.3412 | 6.00 | 0.094 | 7.43  | 2.3552 | 3.56 | 0.088 | 7.43  | 2.4808 | 3.48 | 0.166 |
| Er | 3 | Cl | -1 | 3   | 0.507 | 2.2598 | 6.00 | 0.017 | 6.33  | 2.2690 | 3.38 | 0.021 | 6.33  | 2.3699 | 3.31 | 0.097 |
| Er | 3 | F  | -1 | 16  | 0.421 | 1.8466 | 5.50 | 0.102 | 8.13  | 1.8550 | 2.88 | 0.107 | 8.13  | 1.9046 | 2.94 | 0.106 |
| Er | 3 | O  | -2 | 37  | 0.412 | 1.9561 | 5.50 | 0.082 | 7.08  | 1.9685 | 2.92 | 0.081 | 7.08  | 2.0034 | 2.98 | 0.087 |
| Er | 3 | Se | -2 | 6   | 0.556 | 2.4342 | 7.00 | 0.056 | 6.00  | 2.4519 | 3.64 | 0.047 | 6.00  | 2.5801 | 3.50 | 0.070 |
| Er | 3 | S  | -2 | 16  | 0.525 | 2.3237 | 6.00 | 0.089 | 6.38  | 2.3412 | 3.50 | 0.091 | 6.38  | 2.4556 | 3.40 | 0.139 |
| Eu | 2 | Br | -1 | 3   | 0.465 | 2.5001 | 6.00 | 0.064 | 7.33  | 2.5099 | 3.79 | 0.065 | 7.33  | 2.6311 | 3.77 | 0.094 |
| Eu | 2 | Cl | -1 | 2   | 0.425 | 2.4145 | 5.50 | 0.003 | 9.00  | 2.4186 | 3.67 | 0.003 | 9.00  | 2.4968 | 3.72 | 0.003 |
| Eu | 2 | F  | -1 | 2   | 0.503 | 1.8142 | 5.50 | 0.069 | 7.00  | 1.8249 | 3.18 | 0.049 | 7.00  | 1.9902 | 3.12 | 0.037 |
| Eu | 2 | I  | -1 | 2   | 0.525 | 2.6629 | 6.50 | 0.010 | 6.50  | 2.6736 | 4.05 | 0.011 | 6.50  | 2.8543 | 3.95 | 0.080 |
| Eu | 2 | O  | -2 | 9   | 0.494 | 1.8916 | 6.00 | 0.077 | 10.11 | 1.9154 | 3.43 | 0.099 | 10.00 | 2.1079 | 3.37 | 0.136 |
| Eu | 2 | S  | -2 | 19  | 0.443 | 2.4717 | 6.00 | 0.056 | 7.63  | 2.4813 | 3.72 | 0.059 | 7.63  | 2.5768 | 3.74 | 0.061 |
| Eu | 3 | Cl | -1 | 5   | 0.485 | 2.3200 | 6.00 | 0.009 | 8.20  | 2.3308 | 3.52 | 0.017 | 8.20  | 2.4450 | 3.48 | 0.092 |
| Eu | 3 | F  | -1 | 3   | 0.443 | 1.8776 | 5.50 | 0.018 | 8.00  | 1.8893 | 2.96 | 0.017 | 8.00  | 1.9599 | 2.99 | 0.020 |
| Eu | 3 | O  | -2 | 35  | 0.434 | 2.0047 | 5.50 | 0.083 | 7.63  | 2.0189 | 3.05 | 0.082 | 7.69  | 2.0751 | 3.09 | 0.092 |
| Eu | 3 | S  | -2 | 6   | 0.503 | 2.3918 | 6.00 | 0.154 | 7.00  | 2.4023 | 3.56 | 0.157 | 7.00  | 2.5135 | 3.49 | 0.121 |
| Fe | 2 | Br | -1 | 5   | 0.479 | 2.0952 | 5.50 | 0.158 | 6.00  | 2.1009 | 3.32 | 0.166 | 6.00  | 2.2162 | 3.29 | 0.215 |
| Fe | 2 | Cl | -1 | 5   | 0.439 | 2.0000 | 5.00 | 0.036 | 6.00  | 2.0054 | 3.12 | 0.035 | 6.00  | 2.0802 | 3.15 | 0.039 |
| Fe | 2 | F  | -1 | 26  | 0.489 | 1.5077 | 5.50 | 0.096 | 6.00  | 1.5282 | 2.77 | 0.078 | 6.00  | 1.6561 | 2.73 | 0.128 |
| Fe | 2 | H  | -1 | 6   | 0.466 | 1.0507 | 5.50 | 0.092 | 6.00  | 1.0676 | 2.25 | 0.078 | 6.00  | 1.1730 | 2.24 | 0.098 |
| Fe | 2 | I  | -1 | 2   | 0.540 | 2.2579 | 6.00 | 0.019 | 5.00  | 2.2655 | 3.54 | 0.029 | 5.00  | 2.4149 | 3.42 | 0.225 |
| Fe | 2 | N  | -3 | 6   | 0.367 | 1.7473 | 5.50 | 0.043 | 4.00  | 1.7514 | 2.54 | 0.047 | 4.00  | 1.7495 | 2.67 | 0.045 |
| Fe | 2 | O  | -2 | 113 | 0.480 | 1.5791 | 5.50 | 0.097 | 5.82  | 1.6218 | 2.83 | 0.105 | 5.76  | 1.7347 | 2.79 | 0.127 |
| Fe | 2 | P  | -3 | 4   | 0.680 | 1.7103 | 6.50 | 0.060 | 4.00  | 1.7898 | 3.25 | 0.063 | 4.00  | 2.0043 | 2.92 | 0.113 |
| Fe | 2 | S  | -2 | 30  | 0.457 | 2.0111 | 5.50 | 0.129 | 5.33  | 2.0236 | 3.13 | 0.125 | 5.33  | 2.1063 | 3.13 | 0.139 |
| Fe | 3 | Br | -1 | 4   | 0.578 | 2.1363 | 6.50 | 0.107 | 4.00  | 2.1676 | 3.17 | 0.095 | 4.00  | 2.2270 | 3.00 | 0.148 |
| Fe | 3 | Cl | -1 | 21  | 0.538 | 1.9826 | 6.00 | 0.110 | 5.43  | 2.0042 | 3.10 | 0.115 | 5.43  | 2.1000 | 2.98 | 0.203 |



|    |   |    |    |     |       |        |      |       |      |        |      |       |      |        |      |       |
|----|---|----|----|-----|-------|--------|------|-------|------|--------|------|-------|------|--------|------|-------|
| Fe | 3 | F  | -1 | 59  | 0.411 | 1.6367 | 5.00 | 0.060 | 5.98 | 1.6424 | 2.52 | 0.063 | 5.98 | 1.6703 | 2.59 | 0.066 |
| Fe | 3 | I  | -1 | 2   | 0.523 | 2.3766 | 6.00 | 0.000 | 4.00 | 2.3842 | 3.29 | 0.000 | 4.00 | 2.4281 | 3.20 | 0.000 |
| Fe | 3 | N  | -3 | 3   | 0.606 | 1.7248 | 6.00 | 0.063 | 3.33 | 1.7603 | 2.70 | 0.111 | 3.33 | 1.7800 | 2.48 | 0.394 |
| Fe | 3 | O  | -2 | 165 | 0.420 | 1.7084 | 5.00 | 0.100 | 5.73 | 1.7211 | 2.60 | 0.112 | 5.73 | 1.7525 | 2.66 | 0.104 |
| Fe | 4 | O  | -2 | 2   | 0.410 | 1.7656 | 5.50 | 0.025 | 6.00 | 1.7695 | 2.53 | 0.021 | 6.00 | 1.7857 | 2.60 | 0.024 |
| Ga | 1 | Cl | -1 | 3   | 0.440 | 2.3204 | 6.00 | 0.072 | 9.00 | 2.3288 | 3.93 | 0.072 | 9.00 | 2.4745 | 3.95 | 0.087 |
| Ga | 1 | I  | -1 | 2   | 0.541 | 2.3877 | 7.00 | 0.022 | 8.00 | 2.4014 | 4.31 | 0.024 | 8.00 | 2.7428 | 4.18 | 0.025 |
| Ga | 3 | As | -3 | 6   | 0.466 | 2.4181 | 6.50 | 0.044 | 3.33 | 2.4205 | 3.14 | 0.049 | 3.33 | 2.4292 | 3.13 | 0.116 |
| Ga | 3 | Br | -1 | 4   | 0.619 | 2.1135 | 6.50 | 0.026 | 4.00 | 2.1461 | 3.22 | 0.026 | 4.00 | 2.2175 | 2.99 | 0.045 |
| Ga | 3 | Cl | -1 | 13  | 0.578 | 1.9779 | 6.50 | 0.034 | 4.00 | 2.0128 | 3.02 | 0.040 | 4.00 | 2.0705 | 2.84 | 0.049 |
| Ga | 3 | F  | -1 | 13  | 0.451 | 1.5604 | 5.50 | 0.035 | 6.00 | 1.5706 | 2.54 | 0.036 | 6.00 | 1.6261 | 2.55 | 0.049 |
| Ga | 3 | H  | -1 | 3   | 0.474 | 1.4078 | 6.00 | 0.257 | 4.00 | 1.4236 | 2.25 | 0.283 | 4.00 | 1.4528 | 2.22 | 0.360 |
| Ga | 3 | N  | -3 | 5   | 0.506 | 1.7620 | 6.00 | 0.034 | 4.00 | 1.7820 | 2.66 | 0.092 | 4.00 | 1.8207 | 2.59 | 0.128 |
| Ga | 3 | O  | -2 | 84  | 0.373 | 1.7161 | 5.00 | 0.109 | 4.90 | 1.7236 | 2.45 | 0.109 | 4.90 | 1.7250 | 2.57 | 0.110 |
| Ga | 3 | P  | -3 | 7   | 0.433 | 2.3184 | 6.00 | 0.097 | 3.43 | 2.3192 | 3.00 | 0.095 | 3.43 | 2.3264 | 3.04 | 0.124 |
| Ga | 3 | Sb | -3 | 2   | 0.669 | 2.6418 | 7.00 | 0.017 | 3.00 | 2.6449 | 3.61 | 0.024 | 3.00 | 2.6446 | 3.31 | 0.046 |
| Ga | 3 | Se | -2 | 30  | 0.513 | 2.2472 | 6.50 | 0.113 | 4.00 | 2.2662 | 3.16 | 0.102 | 4.00 | 2.3065 | 3.08 | 0.142 |
| Ga | 3 | S  | -2 | 52  | 0.483 | 2.1246 | 6.00 | 0.079 | 4.00 | 2.1427 | 2.98 | 0.073 | 4.00 | 2.1747 | 2.94 | 0.097 |
| Ga | 3 | Te | -2 | 11  | 0.558 | 2.4449 | 7.00 | 0.100 | 4.00 | 2.4749 | 3.44 | 0.096 | 4.00 | 2.5284 | 3.30 | 0.146 |
| Gd | 3 | Cl | -1 | 4   | 0.533 | 2.2713 | 6.00 | 0.068 | 7.75 | 2.2854 | 3.56 | 0.063 | 7.75 | 2.4381 | 3.45 | 0.063 |
| Gd | 3 | F  | -1 | 3   | 0.406 | 1.9072 | 5.50 | 0.010 | 8.33 | 1.9141 | 2.92 | 0.016 | 8.33 | 1.9502 | 2.99 | 0.016 |
| Gd | 3 | O  | -2 | 77  | 0.415 | 1.9965 | 5.50 | 0.120 | 7.77 | 2.0109 | 3.01 | 0.138 | 7.91 | 2.0505 | 3.07 | 0.139 |
| Gd | 3 | S  | -2 | 5   | 0.552 | 2.3703 | 6.00 | 0.185 | 7.20 | 2.3845 | 3.67 | 0.171 | 7.20 | 2.5404 | 3.53 | 0.094 |
| Ge | 2 | As | -3 | 3   | 0.458 | 2.3808 | 6.50 | 0.028 | 2.00 | 2.4137 | 3.08 | 0.045 | 2.00 | 2.4137 | 3.08 | 0.055 |
| Ge | 2 | Br | -1 | 4   | 0.531 | 2.2006 | 6.00 | 0.105 | 6.00 | 2.2039 | 3.56 | 0.113 | 5.50 | 2.3466 | 3.38 | 0.157 |
| Ge | 2 | Cl | -1 | 3   | 0.490 | 2.0749 | 5.50 | 0.072 | 5.00 | 2.0857 | 3.24 | 0.104 | 5.00 | 2.1706 | 3.17 | 0.116 |
| Ge | 2 | I  | -1 | 3   | 0.591 | 2.2913 | 7.00 | 0.147 | 6.00 | 2.3074 | 3.81 | 0.136 | 6.00 | 2.5378 | 3.61 | 0.218 |
| Ge | 2 | N  | -3 | 2   | 0.461 | 1.8612 | 6.00 | 0.054 | 2.00 | 1.8708 | 2.54 | 0.031 | 2.00 | 1.8708 | 2.53 | 0.038 |
| Ge | 2 | P  | -3 | 3   | 0.580 | 2.2278 | 6.50 | 0.045 | 2.00 | 2.3116 | 3.15 | 0.072 | 2.00 | 2.3114 | 2.97 | 0.113 |
| Ge | 2 | Te | -2 | 9   | 0.585 | 2.2694 | 7.00 | 0.025 | 6.00 | 2.2931 | 3.78 | 0.025 | 6.00 | 2.5270 | 3.60 | 0.028 |

|    |   |    |    |     |       |        |      |       |      |        |      |       |      |        |      |       |
|----|---|----|----|-----|-------|--------|------|-------|------|--------|------|-------|------|--------|------|-------|
| Ge | 4 | As | -3 | 7   | 0.465 | 2.4695 | 6.00 | 0.077 | 3.86 | 2.4709 | 3.13 | 0.077 | 3.86 | 2.4668 | 3.12 | 0.124 |
| Ge | 4 | Cl | -1 | 2   | 0.610 | 2.0762 | 6.00 | 0.104 | 5.00 | 2.0981 | 3.12 | 0.017 | 5.00 | 2.1432 | 2.89 | 0.551 |
| Ge | 4 | F  | -1 | 20  | 0.484 | 1.5786 | 5.50 | 0.099 | 6.00 | 1.5916 | 2.49 | 0.087 | 6.00 | 1.6377 | 2.45 | 0.114 |
| Ge | 4 | I  | -1 | 2   | 0.711 | 2.4339 | 7.50 | 0.017 | 4.00 | 2.5000 | 3.53 | 0.007 | 4.00 | 2.5000 | 3.16 | 0.013 |
| Ge | 4 | N  | -3 | 3   | 0.469 | 1.8476 | 6.00 | 0.140 | 4.00 | 1.8722 | 2.55 | 0.156 | 4.00 | 1.8719 | 2.53 | 0.199 |
| Ge | 4 | O  | -2 | 167 | 0.396 | 1.7394 | 5.00 | 0.101 | 4.29 | 1.7504 | 2.35 | 0.114 | 4.29 | 1.7517 | 2.44 | 0.118 |
| Ge | 4 | P  | -3 | 8   | 0.552 | 2.3138 | 6.50 | 0.149 | 4.00 | 2.3333 | 3.13 | 0.141 | 4.00 | 2.3331 | 3.00 | 0.206 |
| Ge | 4 | Se | -2 | 19  | 0.545 | 2.3326 | 6.00 | 0.101 | 4.00 | 2.3509 | 3.14 | 0.101 | 4.00 | 2.3503 | 3.01 | 0.149 |
| Ge | 4 | S  | -2 | 40  | 0.514 | 2.1918 | 6.00 | 0.073 | 4.00 | 2.2120 | 2.96 | 0.081 | 4.00 | 2.2116 | 2.87 | 0.112 |
| Ge | 4 | Te | -2 | 3   | 0.593 | 2.5746 | 7.00 | 0.129 | 3.67 | 2.6514 | 3.46 | 0.296 | 3.67 | 2.6313 | 3.26 | 0.167 |
| H  | 1 | Br | -1 | 5   | 0.725 | 1.0705 | 6.00 | 0.024 | 1.80 | 1.2286 | 2.70 | 0.045 | 1.00 | 1.3146 | 1.98 | 0.092 |
| H  | 1 | Cl | -1 | 3   | 0.685 | 1.0104 | 5.50 | 0.046 | 1.67 | 1.1418 | 2.61 | 0.046 | 1.00 | 1.2316 | 1.89 | 0.138 |
| H  | 1 | F  | -1 | 5   | 0.558 | 0.7078 | 4.50 | 0.021 | 1.80 | 0.7790 | 1.91 | 0.120 | 1.80 | 0.8872 | 1.77 | 0.058 |
| H  | 1 | I  | -1 | 2   | 0.786 | 1.1778 | 6.50 | 0.004 | 1.00 | 1.4483 | 2.59 | 0.022 | 1.00 | 1.4481 | 2.11 | 0.047 |
| H  | 1 | O  | -2 | 244 | 0.457 | 0.8704 | 4.00 | 0.033 | 1.40 | 0.9337 | 1.75 | 0.074 | 1.37 | 0.9520 | 1.73 | 0.059 |
| H  | 1 | S  | -2 | 5   | 0.591 | 1.1916 | 5.50 | 0.039 | 1.00 | 1.2917 | 2.15 | 0.062 | 1.00 | 1.2910 | 1.95 | 0.099 |
| Hf | 4 | Cl | -1 | 5   | 0.483 | 2.2444 | 6.50 | 0.023 | 6.00 | 2.2516 | 3.15 | 0.039 | 6.00 | 2.2963 | 3.11 | 0.055 |
| Hf | 4 | F  | -1 | 4   | 0.469 | 1.7752 | 5.50 | 0.011 | 7.25 | 1.7846 | 2.74 | 0.009 | 7.25 | 1.8424 | 2.73 | 0.066 |
| Hf | 4 | I  | -1 | 4   | 0.584 | 2.5768 | 7.00 | 0.044 | 6.00 | 2.5922 | 3.67 | 0.004 | 6.00 | 2.6725 | 3.49 | 0.040 |
| Hf | 4 | O  | -2 | 19  | 0.478 | 1.8336 | 6.00 | 0.081 | 7.11 | 1.8560 | 2.82 | 0.116 | 7.11 | 1.9159 | 2.79 | 0.187 |
| Hf | 4 | Se | -2 | 4   | 0.645 | 2.3789 | 7.50 | 0.071 | 6.00 | 2.4176 | 3.61 | 0.060 | 6.00 | 2.5285 | 3.34 | 0.104 |
| Hf | 4 | S  | -2 | 6   | 0.615 | 2.2355 | 7.00 | 0.151 | 6.00 | 2.2615 | 3.40 | 0.217 | 6.00 | 2.3600 | 3.17 | 0.358 |
| Hg | 1 | Cl | -1 | 3   | 0.455 | 2.1734 | 5.50 | 0.103 | 5.00 | 2.1974 | 3.59 | 0.127 | 5.00 | 2.2934 | 3.55 | 0.156 |
| Hg | 1 | F  | -1 | 3   | 0.473 | 1.7651 | 5.50 | 0.045 | 5.00 | 1.7882 | 3.23 | 0.050 | 5.00 | 1.9356 | 3.19 | 0.079 |
| Hg | 1 | O  | -2 | 14  | 0.465 | 1.8128 | 5.50 | 0.051 | 4.43 | 1.8609 | 3.26 | 0.044 | 4.14 | 1.9870 | 3.18 | 0.080 |
| Hg | 2 | Br | -1 | 7   | 0.495 | 2.2544 | 6.00 | 0.061 | 5.00 | 2.2652 | 3.44 | 0.082 | 5.00 | 2.3547 | 3.36 | 0.143 |
| Hg | 2 | Cl | -1 | 13  | 0.455 | 2.1514 | 5.50 | 0.093 | 5.23 | 2.1649 | 3.27 | 0.186 | 5.08 | 2.2247 | 3.23 | 0.150 |
| Hg | 2 | F  | -1 | 7   | 0.473 | 1.7338 | 5.50 | 0.081 | 6.29 | 1.7395 | 2.97 | 0.080 | 6.29 | 1.8564 | 2.94 | 0.121 |
| Hg | 2 | I  | -1 | 10  | 0.555 | 2.3816 | 6.00 | 0.029 | 4.00 | 2.4001 | 3.59 | 0.047 | 4.00 | 2.5281 | 3.45 | 0.071 |
| Hg | 2 | O  | -2 | 29  | 0.465 | 1.8128 | 5.50 | 0.094 | 6.48 | 1.8514 | 3.07 | 0.113 | 6.34 | 1.9437 | 3.03 | 0.118 |

|      |   |    |    |    |       |        |      |       |      |        |      |       |      |        |      |       |
|------|---|----|----|----|-------|--------|------|-------|------|--------|------|-------|------|--------|------|-------|
| Hg   | 2 | Se | -2 | 5  | 0.504 | 2.2518 | 6.00 | 0.036 | 4.00 | 2.2745 | 3.35 | 0.044 | 4.00 | 2.3674 | 3.29 | 0.061 |
| Hg   | 2 | S  | -2 | 18 | 0.473 | 2.2050 | 5.50 | 0.070 | 4.39 | 2.2344 | 3.29 | 0.086 | 4.28 | 2.3049 | 3.25 | 0.097 |
| Hg   | 2 | Te | -2 | 3  | 0.549 | 2.3792 | 7.00 | 0.071 | 4.00 | 2.3976 | 3.57 | 0.057 | 4.00 | 2.5215 | 3.44 | 0.085 |
| Ho   | 3 | F  | -1 | 9  | 0.424 | 1.8448 | 5.50 | 0.060 | 8.33 | 1.8550 | 2.90 | 0.062 | 8.33 | 1.9091 | 2.95 | 0.068 |
| Ho   | 3 | O  | -2 | 46 | 0.415 | 1.9710 | 5.50 | 0.111 | 7.37 | 1.9813 | 2.95 | 0.114 | 7.39 | 2.0199 | 3.02 | 0.126 |
| Ho   | 3 | S  | -2 | 8  | 0.522 | 2.3380 | 6.00 | 0.068 | 6.88 | 2.3542 | 3.54 | 0.068 | 6.88 | 2.4759 | 3.45 | 0.151 |
| Hx#2 | 1 | F  | -1 | 6  | 0.558 | 0.6665 | 4.50 | 0.050 | 2.00 | 0.7239 | 1.92 | 0.057 | 2.00 | 0.8325 | 1.75 | 0.137 |
| Hx   | 1 | S  | -2 | 12 | 0.591 | 1.0978 | 5.50 | 0.061 | 1.83 | 1.1676 | 2.67 | 0.093 | 1.00 | 1.2623 | 1.93 | 0.157 |
| I    | 5 | F  | -1 | 13 | 0.370 | 1.8557 | 7.00 | 0.146 | 4.92 | 1.8747 | 2.40 | 0.203 | 5.69 | 1.8647 | 2.58 | 0.131 |
| I    | 5 | O  | -2 | 67 | 0.424 | 1.9777 | 6.00 | 0.108 | 3.07 | 2.0255 | 2.43 | 0.151 | 3.09 | 1.9983 | 2.48 | 0.174 |
| I    | 7 | O  | -2 | 5  | 0.419 | 1.9227 | 5.50 | 0.116 | 5.80 | 1.9279 | 2.46 | 0.144 | 5.80 | 1.9179 | 2.51 | 0.221 |
| In   | 1 | Br | -1 | 10 | 0.454 | 2.4666 | 6.00 | 0.037 | 8.40 | 2.4747 | 4.10 | 0.030 | 8.40 | 2.6436 | 4.09 | 0.052 |
| In   | 1 | Cl | -1 | 8  | 0.413 | 2.4386 | 6.00 | 0.043 | 8.50 | 2.4455 | 3.93 | 0.048 | 8.63 | 2.5318 | 3.99 | 0.059 |
| In   | 1 | I  | -1 | 6  | 0.514 | 2.5077 | 7.00 | 0.017 | 7.83 | 2.5122 | 4.31 | 0.017 | 7.83 | 2.7987 | 4.22 | 0.032 |
| In   | 1 | Te | -2 | 3  | 0.508 | 2.4779 | 6.50 | 0.057 | 7.67 | 2.4837 | 4.25 | 0.059 | 7.67 | 2.7572 | 4.17 | 0.127 |
| In   | 3 | As | -3 | 7  | 0.553 | 2.5433 | 6.50 | 0.065 | 4.00 | 2.5516 | 3.51 | 0.065 | 4.00 | 2.6037 | 3.37 | 0.097 |
| In   | 3 | Br | -1 | 5  | 0.589 | 2.2894 | 6.50 | 0.083 | 4.40 | 2.3201 | 3.40 | 0.132 | 4.40 | 2.4012 | 3.21 | 0.087 |
| In   | 3 | Cl | -1 | 4  | 0.548 | 2.1347 | 6.00 | 0.017 | 6.00 | 2.1422 | 3.31 | 0.012 | 6.00 | 2.2627 | 3.18 | 0.038 |
| In   | 3 | F  | -1 | 17 | 0.421 | 1.7573 | 5.50 | 0.072 | 6.47 | 1.7679 | 2.70 | 0.089 | 6.53 | 1.8061 | 2.76 | 0.081 |
| In   | 3 | I  | -1 | 5  | 0.667 | 2.4777 | 7.00 | 0.012 | 4.00 | 2.5279 | 3.68 | 0.047 | 4.00 | 2.6120 | 3.38 | 0.074 |
| In   | 3 | N  | -3 | 2  | 0.416 | 2.0234 | 6.00 | 0.012 | 4.00 | 2.0358 | 2.76 | 0.012 | 4.00 | 2.0491 | 2.82 | 0.014 |
| In   | 3 | O  | -2 | 41 | 0.353 | 1.9030 | 5.00 | 0.145 | 6.00 | 1.9096 | 2.67 | 0.150 | 6.02 | 1.8979 | 2.82 | 0.142 |
| In   | 3 | P  | -3 | 6  | 0.446 | 2.5097 | 6.00 | 0.040 | 3.83 | 2.5105 | 3.27 | 0.040 | 3.83 | 2.5284 | 3.28 | 0.083 |
| In   | 3 | Sb | -3 | 5  | 0.634 | 2.6439 | 7.00 | 0.095 | 4.00 | 2.6799 | 3.78 | 0.059 | 4.00 | 2.7551 | 3.52 | 0.101 |
| In   | 3 | Se | -2 | 20 | 0.484 | 2.4305 | 6.00 | 0.101 | 4.30 | 2.4450 | 3.32 | 0.100 | 4.30 | 2.4842 | 3.28 | 0.170 |
| In   | 3 | S  | -2 | 75 | 0.456 | 2.3080 | 6.00 | 0.103 | 5.45 | 2.3192 | 3.25 | 0.107 | 5.45 | 2.3676 | 3.25 | 0.142 |
| In   | 3 | Te | -2 | 15 | 0.534 | 2.6228 | 6.50 | 0.062 | 4.00 | 2.6485 | 3.57 | 0.064 | 4.00 | 2.6952 | 3.46 | 0.094 |
| Ir   | 3 | Cl | -1 | 2  | 0.402 | 2.0582 | 5.50 | 0.067 | 6.00 | 2.0627 | 2.92 | 0.067 | 6.00 | 2.0847 | 3.00 | 0.073 |
| Ir   | 4 | O  | -2 | 12 | 0.436 | 1.8323 | 5.50 | 0.084 | 6.00 | 1.8394 | 2.65 | 0.077 | 6.00 | 1.8658 | 2.68 | 0.092 |
| Ir   | 5 | O  | -2 | 4  | 0.479 | 1.8979 | 6.00 | 0.101 | 6.00 | 1.9050 | 2.69 | 0.108 | 6.00 | 1.9248 | 2.66 | 0.140 |

|    |   |    |    |     |       |        |      |       |       |        |      |       |       |        |      |       |
|----|---|----|----|-----|-------|--------|------|-------|-------|--------|------|-------|-------|--------|------|-------|
| K  | 1 | As | -3 | 38  | 0.674 | 2.3581 | 7.50 | 0.084 | 5.26  | 2.3946 | 4.49 | 0.086 | 4.84  | 2.8744 | 4.12 | 0.132 |
| K  | 1 | Br | -1 | 20  | 0.595 | 2.1721 | 7.00 | 0.051 | 10.00 | 2.1900 | 4.42 | 0.058 | 9.80  | 2.6898 | 4.20 | 0.135 |
| K  | 1 | Cl | -1 | 52  | 0.555 | 2.0767 | 6.50 | 0.049 | 9.04  | 2.0926 | 4.12 | 0.055 | 8.94  | 2.4908 | 3.96 | 0.093 |
| K  | 1 | F  | -1 | 104 | 0.428 | 1.8333 | 5.50 | 0.056 | 9.80  | 1.8466 | 3.44 | 0.058 | 9.82  | 1.9748 | 3.48 | 0.059 |
| K  | 1 | H  | -1 | 11  | 0.451 | 1.8764 | 5.50 | 0.115 | 9.09  | 1.8877 | 3.54 | 0.115 | 9.09  | 2.0630 | 3.54 | 0.120 |
| K  | 1 | I  | -1 | 16  | 0.655 | 2.2888 | 7.00 | 0.050 | 8.44  | 2.3133 | 4.66 | 0.056 | 8.19  | 2.9020 | 4.34 | 0.126 |
| K  | 1 | N  | -3 | 31  | 0.525 | 2.0009 | 6.00 | 0.056 | 7.00  | 2.0282 | 3.81 | 0.061 | 6.77  | 2.3150 | 3.69 | 0.110 |
| K  | 1 | Nx | -3 | 23  | 0.525 | 1.9663 | 6.00 | 0.050 | 6.48  | 1.9820 | 3.73 | 0.057 | 6.39  | 2.2629 | 3.61 | 0.095 |
| K  | 1 | O  | -2 | 53  | 0.436 | 1.9423 | 6.00 | 0.091 | 8.81  | 1.9635 | 3.54 | 0.092 | 8.87  | 2.0989 | 3.57 | 0.098 |
| K  | 1 | P  | -3 | 24  | 0.644 | 2.3738 | 7.00 | 0.087 | 5.04  | 2.4033 | 4.38 | 0.093 | 4.88  | 2.8284 | 4.08 | 0.127 |
| K  | 1 | Sb | -3 | 11  | 0.749 | 2.5472 | 8.00 | 0.072 | 4.27  | 2.5902 | 4.76 | 0.073 | 4.18  | 3.1177 | 4.31 | 0.144 |
| K  | 1 | Se | -2 | 53  | 0.604 | 2.2971 | 7.00 | 0.058 | 6.55  | 2.3225 | 4.33 | 0.060 | 6.36  | 2.7449 | 4.09 | 0.105 |
| K  | 1 | S  | -2 | 40  | 0.573 | 2.1680 | 6.50 | 0.063 | 7.53  | 2.1943 | 4.18 | 0.062 | 7.23  | 2.5899 | 3.98 | 0.103 |
| K  | 1 | Te | -2 | 20  | 0.649 | 2.4180 | 7.00 | 0.053 | 6.40  | 2.4379 | 4.58 | 0.053 | 6.05  | 2.9406 | 4.27 | 0.084 |
| La | 3 | Cl | -1 | 2   | 0.459 | 2.4310 | 6.00 | 0.059 | 7.50  | 2.4349 | 3.52 | 0.079 | 7.50  | 2.5116 | 3.51 | 0.258 |
| La | 3 | F  | -1 | 7   | 0.443 | 1.9658 | 5.50 | 0.036 | 10.29 | 1.9760 | 3.16 | 0.037 | 10.29 | 2.0608 | 3.18 | 0.029 |
| La | 3 | O  | -2 | 119 | 0.451 | 2.0639 | 5.50 | 0.100 | 9.27  | 2.0832 | 3.24 | 0.118 | 9.29  | 2.1679 | 3.25 | 0.135 |
| La | 3 | S  | -2 | 18  | 0.588 | 2.4033 | 6.50 | 0.078 | 7.94  | 2.4314 | 3.85 | 0.078 | 7.89  | 2.6362 | 3.66 | 0.135 |
| Li | 1 | As | -3 | 13  | 0.754 | 1.5089 | 7.50 | 0.100 | 4.23  | 1.6030 | 3.78 | 0.091 | 4.15  | 2.1416 | 3.33 | 0.184 |
| Li | 1 | Br | -1 | 13  | 0.675 | 1.5129 | 7.00 | 0.052 | 5.85  | 1.5674 | 3.74 | 0.048 | 5.85  | 2.1012 | 3.42 | 0.112 |
| Li | 1 | Cl | -1 | 15  | 0.634 | 1.3989 | 6.50 | 0.052 | 5.87  | 1.4565 | 3.50 | 0.052 | 5.87  | 1.9193 | 3.24 | 0.072 |
| Li | 1 | F  | -1 | 52  | 0.508 | 1.0867 | 5.50 | 0.044 | 5.56  | 1.1426 | 2.75 | 0.052 | 5.56  | 1.3734 | 2.67 | 0.061 |
| Li | 1 | H  | -1 | 7   | 0.531 | 1.0390 | 5.50 | 0.017 | 7.71  | 1.0818 | 2.93 | 0.035 | 7.71  | 1.3937 | 2.81 | 0.097 |
| Li | 1 | I  | -1 | 11  | 0.735 | 1.6483 | 7.00 | 0.049 | 5.82  | 1.7061 | 4.06 | 0.046 | 5.82  | 2.3415 | 3.66 | 0.126 |
| Li | 1 | N  | -3 | 45  | 0.637 | 1.1543 | 6.00 | 0.078 | 4.16  | 1.2393 | 3.07 | 0.080 | 4.07  | 1.6121 | 2.79 | 0.114 |
| Li | 1 | Nx | -3 | 11  | 0.605 | 1.1235 | 6.00 | 0.008 | 6.00  | 1.1236 | 3.08 | 0.008 | 6.00  | 1.5446 | 2.87 | 0.014 |
| Li | 1 | O  | -2 | 96  | 0.516 | 1.1710 | 5.50 | 0.040 | 5.07  | 1.2316 | 2.82 | 0.061 | 5.03  | 1.4614 | 2.72 | 0.072 |
| Li | 1 | P  | -3 | 6   | 0.724 | 1.4786 | 7.00 | 0.053 | 4.17  | 1.5673 | 3.65 | 0.071 | 4.17  | 2.0648 | 3.26 | 0.088 |
| Li | 1 | Sb | -3 | 3   | 0.821 | 1.6902 | 8.00 | 0.032 | 4.33  | 1.7962 | 4.19 | 0.043 | 4.33  | 2.6201 | 3.83 | 0.852 |
| Li | 1 | Se | -2 | 6   | 0.684 | 1.6027 | 7.00 | 0.109 | 4.33  | 1.6562 | 3.65 | 0.092 | 4.33  | 2.1113 | 3.32 | 0.147 |

|    |   |    |    |     |       |        |      |       |      |        |      |       |      |        |      |       |
|----|---|----|----|-----|-------|--------|------|-------|------|--------|------|-------|------|--------|------|-------|
| Li | 1 | S  | -2 | 13  | 0.653 | 1.4665 | 6.00 | 0.040 | 4.38 | 1.5516 | 3.46 | 0.071 | 4.38 | 1.9613 | 3.17 | 0.075 |
| Li | 1 | Te | -2 | 7   | 0.729 | 1.7103 | 7.00 | 0.074 | 5.14 | 1.7726 | 4.02 | 0.073 | 5.14 | 2.3449 | 3.61 | 0.195 |
| Lu | 3 | Cl | -1 | 4   | 0.433 | 2.2840 | 6.00 | 0.033 | 6.00 | 2.2934 | 3.22 | 0.047 | 6.00 | 2.3371 | 3.26 | 0.055 |
| Lu | 3 | F  | -1 | 2   | 0.412 | 1.8074 | 5.50 | 0.143 | 7.00 | 1.8122 | 2.76 | 0.144 | 7.00 | 1.8451 | 2.82 | 0.175 |
| Lu | 3 | O  | -2 | 47  | 0.421 | 1.9173 | 5.50 | 0.129 | 6.77 | 1.9295 | 2.88 | 0.127 | 6.77 | 1.9697 | 2.93 | 0.149 |
| Lu | 3 | S  | -2 | 13  | 0.557 | 2.2812 | 7.00 | 0.079 | 6.08 | 2.3053 | 3.50 | 0.068 | 6.08 | 2.4362 | 3.36 | 0.126 |
| Mg | 2 | As | -3 | 3   | 0.750 | 2.0440 | 8.00 | 0.111 | 4.67 | 2.1268 | 3.85 | 0.073 | 4.67 | 2.4371 | 3.41 | 0.314 |
| Mg | 2 | Br | -1 | 3   | 0.671 | 1.8906 | 7.00 | 0.032 | 6.00 | 1.9399 | 3.65 | 0.020 | 6.00 | 2.2701 | 3.34 | 0.035 |
| Mg | 2 | Cl | -1 | 9   | 0.630 | 1.7828 | 6.50 | 0.046 | 6.00 | 1.8064 | 3.41 | 0.052 | 6.00 | 2.0916 | 3.16 | 0.086 |
| Mg | 2 | F  | -1 | 21  | 0.504 | 1.4096 | 5.50 | 0.108 | 6.00 | 1.4337 | 2.72 | 0.083 | 6.00 | 1.5805 | 2.65 | 0.112 |
| Mg | 2 | H  | -1 | 20  | 0.559 | 1.2869 | 5.50 | 0.084 | 8.30 | 1.3378 | 2.94 | 0.090 | 8.30 | 1.5892 | 2.78 | 0.280 |
| Mg | 2 | Hx | -1 | 3   | 0.527 | 1.2747 | 5.50 | 0.103 | 4.67 | 1.2951 | 2.50 | 0.191 | 4.33 | 1.4056 | 2.35 | 0.443 |
| Mg | 2 | N  | -3 | 7   | 0.601 | 1.6352 | 6.00 | 0.058 | 4.14 | 1.6790 | 2.99 | 0.075 | 4.14 | 1.8379 | 2.77 | 0.142 |
| Mg | 2 | O  | -2 | 87  | 0.512 | 1.4840 | 5.50 | 0.078 | 5.90 | 1.5381 | 2.83 | 0.083 | 5.90 | 1.6895 | 2.75 | 0.091 |
| Mg | 2 | P  | -3 | 3   | 0.563 | 2.1310 | 7.50 | 0.116 | 4.33 | 2.1740 | 3.42 | 0.073 | 4.33 | 2.3201 | 3.27 | 0.185 |
| Mg | 2 | Sb | -3 | 5   | 0.634 | 2.3927 | 8.00 | 0.063 | 4.40 | 2.4248 | 3.84 | 0.046 | 4.40 | 2.6269 | 3.58 | 0.205 |
| Mg | 2 | S  | -2 | 9   | 0.649 | 1.8237 | 6.50 | 0.093 | 5.56 | 1.8844 | 3.49 | 0.116 | 5.56 | 2.1631 | 3.20 | 0.209 |
| Mn | 2 | As | -3 | 10  | 0.567 | 2.1709 | 6.50 | 0.084 | 4.10 | 2.1969 | 3.42 | 0.069 | 4.10 | 2.3370 | 3.27 | 0.127 |
| Mn | 2 | Br | -1 | 9   | 0.528 | 2.0898 | 6.00 | 0.054 | 5.78 | 2.0952 | 3.42 | 0.065 | 5.78 | 2.2601 | 3.32 | 0.184 |
| Mn | 2 | Cl | -1 | 21  | 0.488 | 1.9968 | 6.00 | 0.056 | 5.90 | 2.0023 | 3.24 | 0.060 | 5.90 | 2.1289 | 3.19 | 0.092 |
| Mn | 2 | F  | -1 | 33  | 0.474 | 1.5649 | 5.50 | 0.040 | 6.12 | 1.5889 | 2.80 | 0.062 | 6.12 | 1.7041 | 2.78 | 0.078 |
| Mn | 2 | I  | -1 | 4   | 0.588 | 2.2605 | 6.50 | 0.020 | 6.00 | 2.2719 | 3.77 | 0.009 | 6.00 | 2.5106 | 3.58 | 0.018 |
| Mn | 2 | N  | -3 | 6   | 0.606 | 1.4734 | 6.50 | 0.080 | 4.33 | 1.6058 | 2.95 | 0.153 | 4.33 | 1.7838 | 2.73 | 0.207 |
| Mn | 2 | O  | -2 | 155 | 0.481 | 1.6276 | 5.50 | 0.074 | 5.95 | 1.6665 | 2.89 | 0.080 | 5.94 | 1.7855 | 2.85 | 0.098 |
| Mn | 2 | Se | -2 | 10  | 0.431 | 2.2475 | 5.50 | 0.094 | 4.40 | 2.2523 | 3.22 | 0.081 | 4.40 | 2.2993 | 3.25 | 0.102 |
| Mn | 2 | S  | -2 | 26  | 0.406 | 2.1547 | 5.50 | 0.075 | 5.31 | 2.1589 | 3.14 | 0.073 | 5.31 | 2.1931 | 3.22 | 0.095 |
| Mn | 2 | Te | -2 | 6   | 0.470 | 2.4245 | 6.00 | 0.069 | 4.33 | 2.4275 | 3.47 | 0.062 | 4.33 | 2.5037 | 3.45 | 0.037 |
| Mn | 3 | F  | -1 | 30  | 0.446 | 1.6018 | 5.50 | 0.073 | 6.00 | 1.6114 | 2.57 | 0.067 | 6.00 | 1.6609 | 2.58 | 0.081 |
| Mn | 3 | O  | -2 | 65  | 0.437 | 1.6899 | 5.50 | 0.095 | 5.86 | 1.7066 | 2.63 | 0.095 | 5.86 | 1.7484 | 2.66 | 0.105 |
| Mn | 4 | Cl | -1 | 2   | 0.517 | 2.0654 | 6.50 | 0.027 | 6.00 | 2.0694 | 3.03 | 0.023 | 6.00 | 2.1290 | 2.94 | 0.032 |

|    |   |    |    |     |       |        |      |       |      |        |      |       |      |        |      |       |
|----|---|----|----|-----|-------|--------|------|-------|------|--------|------|-------|------|--------|------|-------|
| Mn | 4 | F  | -1 | 4   | 0.410 | 1.6161 | 5.00 | 0.181 | 6.00 | 1.6202 | 2.38 | 0.213 | 6.00 | 1.6360 | 2.45 | 0.231 |
| Mn | 4 | O  | -2 | 26  | 0.402 | 1.7327 | 5.00 | 0.112 | 5.92 | 1.7408 | 2.48 | 0.116 | 5.92 | 1.7531 | 2.56 | 0.124 |
| Mn | 5 | O  | -2 | 8   | 0.413 | 1.7888 | 5.50 | 0.043 | 4.00 | 1.7927 | 2.30 | 0.047 | 4.00 | 1.7831 | 2.36 | 0.052 |
| Mn | 6 | O  | -2 | 4   | 0.416 | 1.8202 | 5.50 | 0.078 | 4.00 | 1.8226 | 2.26 | 0.070 | 4.00 | 1.8039 | 2.32 | 0.078 |
| Mn | 7 | O  | -2 | 11  | 0.520 | 1.8736 | 6.50 | 0.078 | 4.00 | 1.9055 | 2.37 | 0.149 | 4.00 | 1.8207 | 2.28 | 0.204 |
| Mo | 2 | Br | -1 | 2   | 0.401 | 2.2222 | 5.50 | 0.008 | 5.00 | 2.2267 | 3.17 | 0.008 | 5.00 | 2.2551 | 3.26 | 0.009 |
| Mo | 2 | Cl | -1 | 9   | 0.441 | 2.0518 | 5.50 | 0.042 | 5.00 | 2.0609 | 3.10 | 0.044 | 5.00 | 2.1258 | 3.13 | 0.053 |
| Mo | 2 | I  | -1 | 4   | 0.461 | 2.3570 | 6.00 | 0.013 | 5.00 | 2.3658 | 3.46 | 0.014 | 5.00 | 2.4488 | 3.45 | 0.017 |
| Mo | 2 | S  | -2 | 5   | 0.422 | 2.0717 | 5.50 | 0.047 | 5.00 | 2.0824 | 3.08 | 0.050 | 5.00 | 2.1295 | 3.13 | 0.057 |
| Mo | 3 | Br | -1 | 4   | 0.541 | 2.1915 | 6.00 | 0.115 | 6.00 | 2.1996 | 3.36 | 0.092 | 6.00 | 2.3176 | 3.24 | 0.134 |
| Mo | 3 | Cl | -1 | 7   | 0.501 | 2.0894 | 6.00 | 0.031 | 6.00 | 2.0978 | 3.17 | 0.046 | 6.00 | 2.1881 | 3.11 | 0.062 |
| Mo | 3 | F  | -1 | 8   | 0.427 | 1.7382 | 5.50 | 0.057 | 6.00 | 1.7412 | 2.66 | 0.056 | 6.00 | 1.7807 | 2.70 | 0.064 |
| Mo | 3 | O  | -2 | 20  | 0.418 | 1.7893 | 5.50 | 0.039 | 5.70 | 1.8042 | 2.68 | 0.053 | 5.70 | 1.8345 | 2.73 | 0.048 |
| Mo | 3 | S  | -2 | 8   | 0.519 | 2.0626 | 6.00 | 0.040 | 6.00 | 2.0962 | 3.21 | 0.042 | 6.00 | 2.1963 | 3.12 | 0.057 |
| Mo | 4 | Cl | -1 | 4   | 0.558 | 2.1283 | 6.50 | 0.070 | 6.00 | 2.1498 | 3.18 | 0.042 | 6.00 | 2.2238 | 3.04 | 0.101 |
| Mo | 4 | O  | -2 | 28  | 0.562 | 1.7239 | 6.50 | 0.086 | 6.00 | 1.7792 | 2.82 | 0.097 | 6.00 | 1.8546 | 2.67 | 0.146 |
| Mo | 5 | O  | -2 | 50  | 0.482 | 1.8476 | 5.50 | 0.062 | 5.96 | 1.8690 | 2.65 | 0.077 | 5.88 | 1.8788 | 2.60 | 0.124 |
| Mo | 6 | O  | -2 | 246 | 0.391 | 1.9093 | 5.00 | 0.106 | 4.63 | 1.9196 | 2.38 | 0.144 | 4.73 | 1.9113 | 2.49 | 0.139 |
| N  | 3 | N  | -3 | 8   | 0.537 | 1.7255 | 6.00 | 0.098 | 1.00 | 1.7633 | 1.95 | 0.110 | 1.00 | 1.5797 | 1.84 | 0.160 |
| N  | 3 | O  | -2 | 35  | 0.448 | 1.4079 | 5.00 | 0.044 | 2.00 | 1.4241 | 1.89 | 0.048 | 2.00 | 1.3924 | 1.91 | 0.058 |
| N  | 5 | F  | -1 | 1   | 0.550 | 1.4072 | 6.00 | 0.000 | 4.00 | 1.4577 | 2.13 | 0.000 | 4.00 | 1.4176 | 2.00 | 0.000 |
| N  | 5 | N  | -3 | 1   | 0.532 | 1.6839 | 6.00 | 0.000 | 2.00 | 1.6945 | 1.98 | 0.000 | 2.00 | 1.5460 | 1.87 | 0.000 |
| N  | 5 | O  | -2 | 70  | 0.450 | 1.4627 | 5.00 | 0.056 | 3.00 | 1.4747 | 1.90 | 0.071 | 3.00 | 1.4337 | 1.91 | 0.086 |
| Na | 1 | As | -3 | 38  | 0.720 | 1.9358 | 7.50 | 0.079 | 4.89 | 1.9971 | 4.19 | 0.078 | 4.55 | 2.5274 | 3.75 | 0.166 |
| Na | 1 | Br | -1 | 9   | 0.641 | 1.7823 | 7.00 | 0.024 | 6.00 | 1.8211 | 3.90 | 0.024 | 6.00 | 2.3052 | 3.63 | 0.041 |
| Na | 1 | Cl | -1 | 21  | 0.601 | 1.6949 | 6.50 | 0.029 | 6.62 | 1.7394 | 3.74 | 0.036 | 6.62 | 2.1633 | 3.53 | 0.060 |
| Na | 1 | F  | -1 | 51  | 0.474 | 1.4288 | 5.50 | 0.031 | 7.14 | 1.4658 | 3.08 | 0.037 | 7.10 | 1.6640 | 3.05 | 0.050 |
| Na | 1 | H  | -1 | 5   | 0.497 | 1.4497 | 5.50 | 0.113 | 7.60 | 1.4769 | 3.20 | 0.104 | 7.60 | 1.7299 | 3.14 | 0.128 |
| Na | 1 | I  | -1 | 4   | 0.701 | 1.9439 | 7.00 | 0.018 | 6.00 | 1.9788 | 4.25 | 0.009 | 6.00 | 2.5633 | 3.89 | 0.056 |
| Na | 1 | N  | -3 | 35  | 0.571 | 1.6073 | 6.00 | 0.056 | 5.20 | 1.6609 | 3.43 | 0.060 | 5.00 | 1.9765 | 3.23 | 0.110 |

|                  |   |    |    |     |       |        |      |       |       |        |      |       |       |        |      |       |
|------------------|---|----|----|-----|-------|--------|------|-------|-------|--------|------|-------|-------|--------|------|-------|
| Na               | 1 | Nx | -3 | 4   | 0.571 | 1.4822 | 6.00 | 0.049 | 6.00  | 1.4948 | 3.34 | 0.053 | 6.00  | 1.8536 | 3.18 | 0.083 |
| Na               | 1 | O  | -2 | 125 | 0.482 | 1.5622 | 6.00 | 0.087 | 5.90  | 1.6027 | 3.16 | 0.091 | 5.76  | 1.7941 | 3.10 | 0.110 |
| Na               | 1 | P  | -3 | 32  | 0.690 | 1.8958 | 7.00 | 0.059 | 4.84  | 1.9531 | 4.04 | 0.061 | 4.56  | 2.4382 | 3.66 | 0.133 |
| Na               | 1 | Sb | -3 | 10  | 0.795 | 1.9877 | 8.00 | 0.102 | 5.10  | 2.0590 | 4.50 | 0.097 | 4.50  | 2.7093 | 3.93 | 0.214 |
| Na               | 1 | Se | -2 | 70  | 0.650 | 1.8988 | 7.00 | 0.053 | 5.87  | 1.9415 | 4.03 | 0.055 | 5.60  | 2.4157 | 3.72 | 0.090 |
| Na               | 1 | S  | -2 | 93  | 0.619 | 1.8314 | 6.50 | 0.085 | 5.76  | 1.8708 | 3.85 | 0.085 | 5.58  | 2.2931 | 3.59 | 0.118 |
| Na               | 1 | Te | -2 | 46  | 0.695 | 2.0301 | 7.00 | 0.067 | 5.87  | 2.0671 | 4.30 | 0.063 | 5.74  | 2.6272 | 3.94 | 0.088 |
| Nb               | 2 | Te | -2 | 5   | 0.448 | 2.3909 | 6.00 | 0.049 | 6.00  | 2.3981 | 3.54 | 0.053 | 6.00  | 2.4788 | 3.55 | 0.045 |
| Nb               | 3 | O  | -2 | 4   | 0.501 | 1.7458 | 6.00 | 0.011 | 6.00  | 1.7843 | 2.86 | 0.033 | 6.00  | 1.8751 | 2.79 | 0.045 |
| Nb               | 4 | F  | -1 | 5   | 0.534 | 1.7584 | 6.00 | 0.055 | 6.00  | 1.8044 | 2.79 | 0.136 | 6.00  | 1.8708 | 2.68 | 0.197 |
| Nb               | 4 | O  | -2 | 12  | 0.526 | 1.7854 | 6.00 | 0.074 | 6.00  | 1.8318 | 2.81 | 0.093 | 6.00  | 1.8922 | 2.71 | 0.131 |
| Nb               | 4 | S  | -2 | 8   | 0.412 | 2.2801 | 5.50 | 0.038 | 5.75  | 2.2878 | 3.03 | 0.037 | 5.75  | 2.3027 | 3.10 | 0.087 |
| Nb               | 5 | As | -3 | 2   | 0.640 | 2.6648 | 7.00 | 0.039 | 4.00  | 2.6683 | 3.45 | 0.033 | 4.00  | 2.6077 | 3.19 | 0.057 |
| Nb               | 5 | Cl | -1 | 10  | 0.616 | 2.2099 | 6.50 | 0.050 | 6.00  | 2.2382 | 3.24 | 0.059 | 6.00  | 2.2778 | 3.01 | 0.086 |
| Nb               | 5 | F  | -1 | 6   | 0.489 | 1.7603 | 5.50 | 0.085 | 6.00  | 1.7769 | 2.57 | 0.068 | 6.00  | 1.7950 | 2.53 | 0.097 |
| Nb               | 5 | N  | -3 | 5   | 0.480 | 2.0288 | 6.00 | 0.225 | 4.40  | 2.0388 | 2.67 | 0.232 | 4.40  | 2.0225 | 2.64 | 0.375 |
| Nb               | 5 | O  | -2 | 160 | 0.498 | 1.8659 | 5.50 | 0.102 | 6.04  | 1.8904 | 2.71 | 0.115 | 6.04  | 1.9086 | 2.64 | 0.130 |
| Nd               | 3 | F  | -1 | 2   | 0.437 | 1.9110 | 5.50 | 0.006 | 10.00 | 1.9200 | 3.08 | 0.015 | 10.00 | 1.9967 | 3.11 | 0.055 |
| Nd               | 3 | O  | -2 | 85  | 0.428 | 2.0243 | 5.50 | 0.100 | 8.21  | 2.0404 | 3.09 | 0.121 | 8.35  | 2.0952 | 3.14 | 0.127 |
| Nd               | 3 | S  | -2 | 10  | 0.510 | 2.4462 | 6.00 | 0.108 | 7.70  | 2.4587 | 3.68 | 0.097 | 7.70  | 2.5883 | 3.60 | 0.142 |
| Nh <sup>#3</sup> | 1 | Br | -1 | 13  | 0.601 | 2.2328 | 6.50 | 0.071 | 9.69  | 2.2426 | 4.48 | 0.065 | 9.69  | 2.7571 | 4.26 | 0.138 |
| Nh               | 1 | Cl | -1 | 33  | 0.561 | 2.1536 | 6.50 | 0.069 | 9.42  | 2.1691 | 4.24 | 0.074 | 9.33  | 2.5874 | 4.08 | 0.105 |
| Nh               | 1 | F  | -1 | 59  | 0.434 | 1.9793 | 5.50 | 0.070 | 10.10 | 1.9953 | 3.63 | 0.073 | 10.17 | 2.1352 | 3.66 | 0.077 |
| Nh               | 1 | I  | -1 | 11  | 0.661 | 2.4058 | 7.00 | 0.038 | 6.91  | 2.4197 | 4.65 | 0.042 | 6.91  | 2.9749 | 4.35 | 0.071 |
| Nh               | 1 | O  | -2 | 92  | 0.442 | 2.0338 | 6.00 | 0.066 | 9.59  | 2.0617 | 3.70 | 0.072 | 9.64  | 2.2154 | 3.72 | 0.069 |
| Nh               | 1 | S  | -2 | 11  | 0.579 | 2.2426 | 7.00 | 0.033 | 8.18  | 2.2687 | 4.32 | 0.029 | 8.00  | 2.6904 | 4.12 | 0.097 |
| Ni               | 2 | Br | -1 | 2   | 0.516 | 1.9673 | 6.00 | 0.105 | 6.00  | 1.9785 | 3.29 | 0.130 | 6.00  | 2.1385 | 3.21 | 0.181 |
| Ni               | 2 | Cl | -1 | 4   | 0.476 | 1.8767 | 5.50 | 0.036 | 6.00  | 1.8829 | 3.09 | 0.054 | 6.00  | 1.9990 | 3.07 | 0.070 |
| Ni               | 2 | F  | -1 | 45  | 0.452 | 1.4963 | 5.00 | 0.080 | 6.00  | 1.5097 | 2.66 | 0.064 | 6.00  | 1.5996 | 2.67 | 0.078 |
| Ni               | 2 | O  | -2 | 135 | 0.443 | 1.5592 | 5.50 | 0.080 | 5.93  | 1.5793 | 2.70 | 0.085 | 5.93  | 1.6575 | 2.72 | 0.099 |

|    |   |    |    |     |       |        |      |       |      |        |      |       |      |        |      |       |
|----|---|----|----|-----|-------|--------|------|-------|------|--------|------|-------|------|--------|------|-------|
| Ni | 2 | P  | -3 | 3   | 0.323 | 2.0689 | 6.50 | 0.009 | 4.00 | 2.0709 | 2.76 | 0.008 | 4.00 | 2.0383 | 2.96 | 0.007 |
| Ni | 2 | Se | -2 | 4   | 0.525 | 1.8986 | 6.00 | 0.081 | 5.25 | 1.9321 | 3.20 | 0.092 | 5.25 | 2.0795 | 3.10 | 0.106 |
| Ni | 2 | S  | -2 | 10  | 0.494 | 1.8570 | 5.50 | 0.077 | 4.70 | 1.8729 | 3.01 | 0.045 | 4.70 | 1.9762 | 2.96 | 0.117 |
| Ni | 2 | Te | -2 | 5   | 0.571 | 2.1118 | 6.50 | 0.019 | 4.00 | 2.1601 | 3.38 | 0.022 | 4.00 | 2.2989 | 3.22 | 0.032 |
| Ni | 3 | F  | -1 | 5   | 0.423 | 1.5687 | 5.00 | 0.071 | 6.00 | 1.5744 | 2.48 | 0.056 | 6.00 | 1.6111 | 2.53 | 0.064 |
| Ni | 3 | O  | -2 | 15  | 0.414 | 1.6489 | 5.50 | 0.058 | 6.00 | 1.6565 | 2.54 | 0.072 | 6.00 | 1.6870 | 2.61 | 0.080 |
| Ni | 3 | S  | -2 | 4   | 0.523 | 1.9212 | 5.50 | 0.185 | 5.00 | 1.9615 | 2.99 | 0.263 | 5.00 | 2.0382 | 2.89 | 0.129 |
| Ni | 4 | F  | -1 | 7   | 0.411 | 1.6145 | 5.50 | 0.117 | 6.00 | 1.6197 | 2.38 | 0.111 | 6.00 | 1.6363 | 2.45 | 0.123 |
| Ni | 4 | O  | -2 | 4   | 0.402 | 1.7216 | 5.00 | 0.202 | 6.00 | 1.7332 | 2.48 | 0.285 | 6.00 | 1.7454 | 2.56 | 0.316 |
| Np | 4 | O  | -2 | 3   | 0.531 | 1.9458 | 6.00 | 0.083 | 7.33 | 1.9668 | 3.06 | 0.105 | 7.33 | 2.0620 | 2.95 | 0.307 |
| Np | 5 | O  | -2 | 5   | 0.431 | 2.0304 | 5.50 | 0.101 | 7.00 | 2.0367 | 2.81 | 0.097 | 7.00 | 2.0390 | 2.83 | 0.112 |
| Np | 6 | O  | -2 | 3   | 0.500 | 2.0157 | 6.00 | 0.151 | 7.00 | 2.0381 | 2.84 | 0.202 | 7.00 | 2.0284 | 2.75 | 0.326 |
| Os | 4 | Br | -1 | 2   | 0.461 | 2.3061 | 6.00 | 0.157 | 6.00 | 2.3111 | 3.17 | 0.128 | 6.00 | 2.3472 | 3.16 | 0.167 |
| Os | 4 | Cl | -1 | 4   | 0.421 | 2.1557 | 6.00 | 0.031 | 6.00 | 2.1603 | 2.94 | 0.038 | 6.00 | 2.1808 | 2.99 | 0.042 |
| Os | 4 | O  | -2 | 3   | 0.498 | 1.7530 | 6.00 | 0.124 | 6.00 | 1.7865 | 2.71 | 0.178 | 6.00 | 1.8376 | 2.65 | 0.233 |
| Os | 5 | F  | -1 | 3   | 0.488 | 1.7581 | 6.00 | 0.340 | 6.00 | 1.7790 | 2.57 | 0.401 | 6.00 | 1.7979 | 2.53 | 0.500 |
| Os | 7 | O  | -2 | 3   | 0.479 | 1.9578 | 5.50 | 0.060 | 6.00 | 1.9657 | 2.58 | 0.043 | 6.00 | 1.9465 | 2.55 | 0.109 |
| Os | 8 | O  | -2 | 5   | 0.512 | 1.9726 | 6.00 | 0.102 | 5.40 | 1.9956 | 2.54 | 0.096 | 5.40 | 1.9295 | 2.45 | 0.251 |
| P  | 3 | O  | -2 | 25  | 0.402 | 1.5153 | 4.50 | 0.020 | 3.00 | 1.5223 | 2.10 | 0.022 | 3.00 | 1.5223 | 2.19 | 0.024 |
| P  | 3 | S  | -2 | 2   | 0.536 | 1.9609 | 6.00 | 0.036 | 3.00 | 2.0218 | 2.80 | 0.033 | 3.00 | 2.0218 | 2.68 | 0.047 |
| P  | 5 | Cl | -1 | 13  | 0.662 | 2.0109 | 7.00 | 0.093 | 4.00 | 2.0649 | 2.87 | 0.082 | 4.00 | 1.9993 | 2.58 | 0.149 |
| P  | 5 | F  | -1 | 3   | 0.535 | 1.4761 | 7.00 | 0.020 | 6.00 | 1.4917 | 2.36 | 0.083 | 6.00 | 1.5218 | 2.25 | 0.120 |
| P  | 5 | I  | -1 | 1   | 0.763 | 2.4979 | 7.50 | 0.000 | 4.00 | 2.5656 | 3.50 | 0.000 | 4.00 | 2.4777 | 3.06 | 0.000 |
| P  | 5 | N  | -3 | 14  | 0.517 | 1.7327 | 6.00 | 0.119 | 4.00 | 1.7576 | 2.39 | 0.107 | 4.00 | 1.7244 | 2.30 | 0.145 |
| P  | 5 | O  | -2 | 252 | 0.437 | 1.6204 | 5.00 | 0.057 | 4.00 | 1.6323 | 2.17 | 0.059 | 4.00 | 1.6169 | 2.20 | 0.070 |
| P  | 5 | Se | -2 | 12  | 0.600 | 2.3208 | 7.00 | 0.117 | 4.00 | 2.3443 | 3.08 | 0.108 | 4.00 | 2.2924 | 2.87 | 0.175 |
| P  | 5 | S  | -2 | 23  | 0.566 | 2.1492 | 6.00 | 0.044 | 4.00 | 2.1701 | 2.86 | 0.051 | 4.00 | 2.1255 | 2.71 | 0.075 |
| Pb | 2 | Br | -1 | 7   | 0.515 | 2.4316 | 6.00 | 0.074 | 7.43 | 2.4429 | 3.86 | 0.051 | 7.14 | 2.6240 | 3.76 | 0.119 |
| Pb | 2 | Cl | -1 | 6   | 0.474 | 2.3464 | 5.50 | 0.044 | 7.33 | 2.3574 | 3.66 | 0.026 | 7.33 | 2.4863 | 3.63 | 0.058 |
| Pb | 2 | F  | -1 | 34  | 0.453 | 1.9092 | 6.00 | 0.061 | 9.18 | 1.9332 | 3.28 | 0.077 | 9.18 | 2.0501 | 3.28 | 0.116 |



|    |   |    |    |    |       |        |      |       |      |        |      |       |      |        |      |       |
|----|---|----|----|----|-------|--------|------|-------|------|--------|------|-------|------|--------|------|-------|
| Pb | 2 | I  | -1 | 22 | 0.575 | 2.5673 | 7.00 | 0.032 | 6.00 | 2.5840 | 4.05 | 0.021 | 6.00 | 2.8086 | 3.88 | 0.031 |
| Pb | 2 | N  | -3 | 1  | 0.445 | 2.0988 | 6.00 | 0.000 | 5.00 | 2.1419 | 3.19 | 0.000 | 5.00 | 2.2045 | 3.21 | 0.000 |
| Pb | 2 | O  | -2 | 98 | 0.433 | 2.0192 | 5.50 | 0.093 | 7.51 | 2.0461 | 3.25 | 0.117 | 7.62 | 2.1185 | 3.28 | 0.168 |
| Pb | 2 | Se | -2 | 7  | 0.524 | 2.4676 | 6.50 | 0.066 | 7.14 | 2.4842 | 3.91 | 0.047 | 7.14 | 2.6725 | 3.81 | 0.124 |
| Pb | 2 | S  | -2 | 49 | 0.493 | 2.3876 | 6.00 | 0.074 | 7.43 | 2.4015 | 3.76 | 0.079 | 7.35 | 2.5498 | 3.69 | 0.101 |
| Pb | 4 | F  | -1 | 4  | 0.424 | 1.9343 | 5.50 | 0.060 | 6.00 | 1.9488 | 2.73 | 0.033 | 6.00 | 1.9707 | 2.78 | 0.038 |
| Pb | 4 | O  | -2 | 27 | 0.354 | 2.0329 | 5.00 | 0.235 | 5.70 | 2.0354 | 2.67 | 0.236 | 5.70 | 2.0299 | 2.82 | 0.237 |
| Pd | 1 | As | -3 | 15 | 0.532 | 1.8197 | 6.50 | 0.061 | 3.60 | 1.8433 | 3.29 | 0.070 | 3.60 | 2.0469 | 3.18 | 0.081 |
| Pd | 2 | As | -3 | 5  | 0.639 | 2.0411 | 7.00 | 0.071 | 4.00 | 2.0999 | 3.47 | 0.053 | 4.00 | 2.2862 | 3.21 | 0.091 |
| Pd | 2 | Br | -1 | 6  | 0.462 | 2.1018 | 5.50 | 0.087 | 4.00 | 2.1192 | 3.11 | 0.058 | 4.00 | 2.1829 | 3.10 | 0.073 |
| Pd | 2 | Cl | -1 | 16 | 0.421 | 1.9982 | 5.00 | 0.072 | 4.00 | 2.0102 | 2.91 | 0.055 | 4.00 | 2.0455 | 2.96 | 0.063 |
| Pd | 2 | F  | -1 | 29 | 0.506 | 1.5688 | 5.50 | 0.048 | 5.17 | 1.6063 | 2.82 | 0.073 | 5.17 | 1.7317 | 2.75 | 0.180 |
| Pd | 2 | O  | -2 | 44 | 0.498 | 1.6236 | 5.50 | 0.102 | 4.00 | 1.6687 | 2.73 | 0.093 | 4.00 | 1.7571 | 2.68 | 0.124 |
| Pd | 2 | P  | -3 | 3  | 0.641 | 1.9529 | 7.00 | 0.052 | 4.00 | 2.0239 | 3.40 | 0.072 | 4.00 | 2.2115 | 3.13 | 0.124 |
| Pd | 2 | Se | -2 | 8  | 0.471 | 2.1344 | 6.00 | 0.034 | 4.00 | 2.1395 | 3.15 | 0.032 | 4.00 | 2.2094 | 3.13 | 0.040 |
| Pd | 2 | S  | -2 | 10 | 0.439 | 2.0256 | 5.50 | 0.113 | 4.00 | 2.0386 | 2.98 | 0.102 | 4.00 | 2.0863 | 3.01 | 0.121 |
| Pd | 4 | Cl | -1 | 2  | 0.470 | 2.1266 | 6.00 | 0.063 | 6.00 | 2.1289 | 3.00 | 0.064 | 6.00 | 2.1694 | 2.98 | 0.081 |
| Pd | 4 | F  | -1 | 3  | 0.457 | 1.6858 | 5.50 | 0.132 | 6.00 | 1.6952 | 2.54 | 0.130 | 6.00 | 1.7304 | 2.54 | 0.161 |
| Pd | 4 | O  | -2 | 3  | 0.449 | 1.8050 | 5.50 | 0.078 | 5.33 | 1.8243 | 2.60 | 0.110 | 5.33 | 1.8457 | 2.62 | 0.034 |
| Pd | 4 | Se | -2 | 2  | 0.520 | 2.3111 | 6.50 | 0.199 | 6.00 | 2.3396 | 3.30 | 0.373 | 5.00 | 2.3949 | 3.14 | 0.468 |
| Pr | 3 | Cl | -1 | 5  | 0.387 | 2.4862 | 5.50 | 0.034 | 7.40 | 2.4883 | 3.40 | 0.032 | 7.40 | 2.5034 | 3.50 | 0.037 |
| Pr | 3 | F  | -1 | 4  | 0.448 | 1.9175 | 5.50 | 0.039 | 9.00 | 1.9300 | 3.07 | 0.051 | 9.00 | 2.0126 | 3.08 | 0.055 |
| Pr | 3 | O  | -2 | 60 | 0.439 | 2.0365 | 5.50 | 0.097 | 8.83 | 2.0542 | 3.16 | 0.125 | 8.88 | 2.1233 | 3.19 | 0.140 |
| Pr | 3 | Se | -2 | 3  | 0.529 | 2.5268 | 7.00 | 0.085 | 7.67 | 2.5423 | 3.80 | 0.097 | 7.67 | 2.6890 | 3.70 | 0.143 |
| Pr | 3 | S  | -2 | 4  | 0.499 | 2.4650 | 6.00 | 0.098 | 7.75 | 2.4797 | 3.68 | 0.076 | 7.75 | 2.5992 | 3.61 | 0.167 |
| Pt | 2 | Cl | -1 | 5  | 0.456 | 1.9770 | 5.50 | 0.051 | 4.00 | 1.9889 | 2.96 | 0.018 | 4.00 | 2.0485 | 2.97 | 0.022 |
| Pt | 2 | O  | -2 | 7  | 0.463 | 1.6577 | 5.50 | 0.119 | 4.00 | 1.6842 | 2.68 | 0.087 | 4.00 | 1.7486 | 2.67 | 0.109 |
| Pt | 2 | Se | -2 | 6  | 0.407 | 2.1652 | 6.00 | 0.041 | 4.00 | 2.1699 | 3.04 | 0.038 | 4.00 | 2.1955 | 3.11 | 0.042 |
| Pt | 2 | S  | -2 | 8  | 0.438 | 2.0245 | 5.50 | 0.104 | 4.00 | 2.0333 | 2.97 | 0.087 | 4.00 | 2.0803 | 3.00 | 0.104 |
| Pt | 3 | O  | -2 | 3  | 0.546 | 1.6656 | 5.50 | 0.070 | 5.00 | 1.7506 | 2.82 | 0.046 | 5.00 | 1.8394 | 2.69 | 0.067 |

|    |   |    |    |    |       |        |      |       |       |        |      |       |       |        |      |       |
|----|---|----|----|----|-------|--------|------|-------|-------|--------|------|-------|-------|--------|------|-------|
| Pt | 4 | Cl | -1 | 5  | 0.440 | 2.1411 | 6.00 | 0.070 | 6.00  | 2.1423 | 2.96 | 0.070 | 6.00  | 2.1707 | 2.98 | 0.084 |
| Pt | 4 | F  | -1 | 15 | 0.488 | 1.6909 | 5.50 | 0.113 | 6.00  | 1.7137 | 2.62 | 0.132 | 6.00  | 1.7612 | 2.57 | 0.170 |
| Pt | 4 | O  | -2 | 18 | 0.479 | 1.8220 | 5.50 | 0.131 | 6.00  | 1.8369 | 2.72 | 0.100 | 6.00  | 1.8810 | 2.69 | 0.130 |
| Pt | 4 | Se | -2 | 5  | 0.489 | 2.3094 | 6.00 | 0.046 | 6.00  | 2.3119 | 3.22 | 0.036 | 6.00  | 2.3601 | 3.17 | 0.047 |
| Pt | 4 | S  | -2 | 3  | 0.458 | 2.2000 | 6.00 | 0.306 | 6.00  | 2.2085 | 3.06 | 0.319 | 6.00  | 2.2401 | 3.05 | 0.341 |
| Pt | 5 | F  | -1 | 3  | 0.424 | 1.7857 | 5.50 | 0.204 | 6.00  | 1.7972 | 2.49 | 0.204 | 6.00  | 1.8058 | 2.54 | 0.243 |
| Pu | 3 | Cl | -1 | 3  | 0.548 | 2.2769 | 7.00 | 0.062 | 7.67  | 2.2906 | 3.60 | 0.058 | 7.67  | 2.4545 | 3.46 | 0.212 |
| Pu | 4 | O  | -2 | 3  | 0.363 | 2.0794 | 5.50 | 0.027 | 7.33  | 2.0821 | 2.83 | 0.026 | 7.33  | 2.0779 | 2.97 | 0.022 |
| Rb | 1 | As | -3 | 11 | 0.650 | 2.5443 | 7.50 | 0.055 | 5.27  | 2.5703 | 4.59 | 0.063 | 5.09  | 3.0147 | 4.28 | 0.103 |
| Rb | 1 | Br | -1 | 31 | 0.572 | 2.3436 | 7.00 | 0.072 | 9.77  | 2.3563 | 4.49 | 0.075 | 9.74  | 2.8029 | 4.31 | 0.135 |
| Rb | 1 | Cl | -1 | 67 | 0.531 | 2.2658 | 6.50 | 0.056 | 9.73  | 2.2756 | 4.25 | 0.055 | 9.70  | 2.6313 | 4.14 | 0.107 |
| Rb | 1 | F  | -1 | 15 | 0.404 | 1.9914 | 5.50 | 0.051 | 10.47 | 2.0019 | 3.54 | 0.046 | 10.47 | 2.0797 | 3.61 | 0.049 |
| Rb | 1 | H  | -1 | 5  | 0.428 | 2.0508 | 5.50 | 0.077 | 8.80  | 2.0579 | 3.61 | 0.078 | 8.80  | 2.1833 | 3.65 | 0.062 |
| Rb | 1 | I  | -1 | 23 | 0.632 | 2.4644 | 7.00 | 0.071 | 9.00  | 2.4826 | 4.79 | 0.066 | 8.78  | 3.0366 | 4.50 | 0.150 |
| Rb | 1 | N  | -3 | 12 | 0.501 | 2.1922 | 6.00 | 0.069 | 8.42  | 2.2051 | 4.00 | 0.071 | 8.33  | 2.4713 | 3.92 | 0.103 |
| Rb | 1 | Nx | -3 | 13 | 0.501 | 2.1499 | 6.00 | 0.027 | 6.31  | 2.1576 | 3.81 | 0.029 | 6.31  | 2.3939 | 3.74 | 0.034 |
| Rb | 1 | O  | -2 | 44 | 0.413 | 2.0860 | 6.50 | 0.056 | 9.77  | 2.1029 | 3.64 | 0.054 | 9.93  | 2.1959 | 3.71 | 0.061 |
| Rb | 1 | P  | -3 | 10 | 0.621 | 2.5292 | 7.00 | 0.034 | 5.40  | 2.5481 | 4.49 | 0.044 | 5.40  | 2.9558 | 4.24 | 0.073 |
| Rb | 1 | Sb | -3 | 6  | 0.725 | 2.6941 | 8.00 | 0.047 | 5.00  | 2.7249 | 4.94 | 0.058 | 5.00  | 3.2731 | 4.53 | 0.186 |
| Rb | 1 | Se | -2 | 19 | 0.580 | 2.4036 | 7.00 | 0.097 | 7.32  | 2.4376 | 4.42 | 0.110 | 7.26  | 2.8399 | 4.24 | 0.130 |
| Rb | 1 | S  | -2 | 29 | 0.550 | 2.3082 | 6.50 | 0.048 | 6.48  | 2.3274 | 4.15 | 0.050 | 6.48  | 2.6596 | 4.01 | 0.076 |
| Rb | 1 | Te | -2 | 3  | 0.626 | 2.4346 | 7.50 | 0.016 | 9.67  | 2.4601 | 4.79 | 0.011 | 9.00  | 3.0186 | 4.49 | 0.068 |
| Re | 3 | Br | -1 | 4  | 0.422 | 2.3042 | 5.50 | 0.019 | 4.75  | 2.3233 | 3.13 | 0.039 | 4.75  | 2.3457 | 3.18 | 0.021 |
| Re | 3 | Cl | -1 | 5  | 0.420 | 2.1578 | 5.50 | 0.022 | 5.00  | 2.1768 | 3.00 | 0.022 | 5.00  | 2.2011 | 3.05 | 0.025 |
| Re | 3 | S  | -2 | 10 | 0.401 | 2.2071 | 6.00 | 0.025 | 5.00  | 2.2133 | 3.00 | 0.029 | 5.00  | 2.2290 | 3.08 | 0.031 |
| Re | 4 | Cl | -1 | 7  | 0.412 | 2.1851 | 5.50 | 0.057 | 6.00  | 2.1875 | 2.95 | 0.049 | 6.00  | 2.2043 | 3.02 | 0.057 |
| Re | 4 | O  | -2 | 4  | 0.507 | 1.7824 | 6.00 | 0.012 | 6.00  | 1.8162 | 2.76 | 0.044 | 6.00  | 1.8709 | 2.68 | 0.067 |
| Re | 5 | O  | -2 | 5  | 0.479 | 1.8266 | 6.00 | 0.115 | 6.00  | 1.8533 | 2.63 | 0.077 | 6.00  | 1.8655 | 2.60 | 0.212 |
| Re | 6 | O  | -2 | 4  | 0.498 | 1.9101 | 6.00 | 0.081 | 5.50  | 1.9321 | 2.61 | 0.228 | 5.50  | 1.9171 | 2.55 | 0.566 |
| Re | 7 | O  | -2 | 41 | 0.508 | 1.9779 | 6.00 | 0.147 | 4.10  | 2.0053 | 2.47 | 0.192 | 4.10  | 1.9302 | 2.40 | 0.225 |

|    |   |    |    |     |       |        |      |       |      |        |      |       |      |        |      |       |
|----|---|----|----|-----|-------|--------|------|-------|------|--------|------|-------|------|--------|------|-------|
| Rh | 3 | Cl | -1 | 2   | 0.440 | 2.0372 | 5.00 | 0.004 | 6.00 | 2.0378 | 2.98 | 0.003 | 6.00 | 2.0863 | 3.01 | 0.004 |
| Rh | 3 | F  | -1 | 8   | 0.488 | 1.6369 | 5.50 | 0.096 | 6.00 | 1.6457 | 2.69 | 0.052 | 6.00 | 1.7275 | 2.65 | 0.069 |
| Rh | 3 | O  | -2 | 13  | 0.478 | 1.6701 | 5.50 | 0.133 | 6.00 | 1.7003 | 2.72 | 0.131 | 6.00 | 1.7749 | 2.69 | 0.167 |
| Rh | 4 | F  | -1 | 1   | 0.406 | 1.6869 | 5.50 | 0.000 | 6.00 | 1.6924 | 2.44 | 0.000 | 6.00 | 1.7070 | 2.52 | 0.000 |
| Rh | 4 | O  | -2 | 1   | 0.403 | 1.7768 | 5.50 | 0.000 | 6.00 | 1.7924 | 2.54 | 0.000 | 6.00 | 1.8056 | 2.62 | 0.000 |
| Ru | 3 | Cl | -1 | 5   | 0.489 | 1.9952 | 5.50 | 0.073 | 6.00 | 2.0045 | 3.05 | 0.057 | 6.00 | 2.0868 | 3.01 | 0.074 |
| Ru | 3 | O  | -2 | 5   | 0.430 | 1.7207 | 5.50 | 0.072 | 6.00 | 1.7337 | 2.65 | 0.058 | 6.00 | 1.7752 | 2.69 | 0.067 |
| Ru | 4 | O  | -2 | 20  | 0.449 | 1.7936 | 5.50 | 0.057 | 6.00 | 1.8055 | 2.64 | 0.064 | 6.00 | 1.8372 | 2.65 | 0.079 |
| Ru | 5 | F  | -1 | 7   | 0.445 | 1.7763 | 5.50 | 0.344 | 6.00 | 1.7850 | 2.51 | 0.341 | 6.00 | 1.7982 | 2.53 | 0.414 |
| Ru | 5 | O  | -2 | 9   | 0.436 | 1.8744 | 5.50 | 0.041 | 6.00 | 1.8785 | 2.59 | 0.038 | 6.00 | 1.8901 | 2.62 | 0.040 |
| Ru | 6 | O  | -2 | 4   | 0.425 | 1.9258 | 5.50 | 0.069 | 4.50 | 1.9275 | 2.42 | 0.060 | 4.50 | 1.9105 | 2.47 | 0.081 |
| S  | 3 | N  | -3 | 4   | 0.432 | 1.7701 | 6.00 | 0.032 | 2.00 | 1.8022 | 2.25 | 0.023 | 2.00 | 1.7771 | 2.29 | 0.027 |
| S  | 4 | Cl | -1 | 6   | 0.545 | 2.0527 | 6.50 | 0.027 | 3.00 | 2.1296 | 2.76 | 0.049 | 3.00 | 2.0792 | 2.64 | 0.073 |
| S  | 4 | N  | -3 | 1   | 0.515 | 1.8108 | 6.00 | 0.000 | 2.00 | 1.8394 | 2.23 | 0.000 | 2.00 | 1.7389 | 2.15 | 0.000 |
| S  | 4 | O  | -2 | 18  | 0.427 | 1.6428 | 5.50 | 0.066 | 3.00 | 1.6546 | 2.15 | 0.070 | 3.00 | 1.6381 | 2.19 | 0.081 |
| S  | 6 | O  | -2 | 195 | 0.441 | 1.6422 | 5.00 | 0.082 | 4.00 | 1.6511 | 2.11 | 0.085 | 4.00 | 1.6221 | 2.14 | 0.100 |
| Sb | 3 | Br | -1 | 4   | 0.537 | 2.3817 | 7.00 | 0.072 | 4.75 | 2.4213 | 3.45 | 0.266 | 4.75 | 2.4877 | 3.32 | 0.113 |
| Sb | 3 | Cl | -1 | 5   | 0.496 | 2.3083 | 6.00 | 0.159 | 4.60 | 2.3334 | 3.26 | 0.123 | 4.40 | 2.3774 | 3.18 | 0.232 |
| Sb | 3 | F  | -1 | 18  | 0.431 | 1.8345 | 5.50 | 0.026 | 4.72 | 1.8660 | 2.69 | 0.122 | 4.94 | 1.8853 | 2.73 | 0.083 |
| Sb | 3 | I  | -1 | 5   | 0.597 | 2.5991 | 7.50 | 0.046 | 6.00 | 2.6188 | 3.90 | 0.102 | 5.80 | 2.7432 | 3.65 | 0.113 |
| Sb | 3 | O  | -2 | 24  | 0.423 | 1.9204 | 5.00 | 0.070 | 4.54 | 1.9488 | 2.78 | 0.148 | 4.54 | 1.9727 | 2.79 | 0.148 |
| Sb | 3 | Se | -2 | 14  | 0.546 | 2.4759 | 6.50 | 0.070 | 5.29 | 2.5122 | 3.61 | 0.101 | 4.71 | 2.5897 | 3.42 | 0.209 |
| Sb | 3 | S  | -2 | 104 | 0.515 | 2.3695 | 6.00 | 0.090 | 4.87 | 2.4050 | 3.40 | 0.133 | 4.45 | 2.4551 | 3.26 | 0.158 |
| Sb | 3 | Te | -2 | 3   | 0.591 | 2.7314 | 7.00 | 0.116 | 4.00 | 2.7894 | 3.81 | 0.013 | 4.00 | 2.8333 | 3.60 | 0.553 |
| Sb | 5 | Cl | -1 | 5   | 0.616 | 2.2232 | 6.50 | 0.072 | 6.00 | 2.2446 | 3.25 | 0.059 | 6.00 | 2.2890 | 3.02 | 0.107 |
| Sb | 5 | F  | -1 | 20  | 0.489 | 1.7660 | 6.00 | 0.062 | 6.00 | 1.7833 | 2.58 | 0.058 | 6.00 | 1.8045 | 2.53 | 0.075 |
| Sb | 5 | O  | -2 | 51  | 0.400 | 1.8977 | 5.50 | 0.111 | 6.00 | 1.9057 | 2.56 | 0.105 | 6.00 | 1.9110 | 2.64 | 0.113 |
| Sb | 5 | Se | -2 | 2   | 0.551 | 2.5898 | 7.00 | 0.003 | 4.00 | 2.5938 | 3.27 | 0.010 | 4.00 | 2.5534 | 3.13 | 0.016 |
| Sb | 5 | S  | -2 | 5   | 0.520 | 2.4425 | 6.00 | 0.045 | 4.00 | 2.4536 | 3.09 | 0.075 | 4.00 | 2.4200 | 3.00 | 0.104 |
| Sc | 3 | Cl | -1 | 5   | 0.612 | 2.1133 | 6.50 | 0.145 | 6.00 | 2.1424 | 3.45 | 0.145 | 6.00 | 2.3078 | 3.23 | 0.262 |

|    |   |    |    |     |       |        |      |       |      |        |      |       |      |        |      |       |
|----|---|----|----|-----|-------|--------|------|-------|------|--------|------|-------|------|--------|------|-------|
| Sc | 3 | F  | -1 | 12  | 0.485 | 1.6532 | 6.00 | 0.042 | 6.17 | 1.6635 | 2.71 | 0.067 | 6.17 | 1.7459 | 2.68 | 0.107 |
| Sc | 3 | O  | -2 | 51  | 0.494 | 1.7322 | 5.50 | 0.098 | 6.25 | 1.7581 | 2.84 | 0.109 | 6.25 | 1.8473 | 2.78 | 0.138 |
| Sc | 3 | S  | -2 | 21  | 0.631 | 2.0945 | 7.00 | 0.056 | 6.05 | 2.1423 | 3.50 | 0.060 | 6.05 | 2.3244 | 3.25 | 0.118 |
| Se | 4 | Br | -1 | 5   | 0.585 | 2.3272 | 7.00 | 0.032 | 6.00 | 2.3496 | 3.43 | 0.030 | 5.40 | 2.3972 | 3.17 | 0.082 |
| Se | 4 | Cl | -1 | 17  | 0.545 | 2.1585 | 6.50 | 0.048 | 6.00 | 2.1769 | 3.19 | 0.045 | 5.59 | 2.2141 | 3.00 | 0.145 |
| Se | 4 | O  | -2 | 161 | 0.427 | 1.8009 | 5.50 | 0.069 | 3.00 | 1.8271 | 2.32 | 0.092 | 3.00 | 1.8105 | 2.37 | 0.104 |
| Se | 6 | O  | -2 | 37  | 0.416 | 1.7987 | 5.50 | 0.093 | 4.00 | 1.8056 | 2.24 | 0.100 | 4.00 | 1.7868 | 2.30 | 0.111 |
| Si | 2 | I  | -1 | 7   | 0.578 | 2.3228 | 6.50 | 0.033 | 2.00 | 2.4290 | 3.27 | 0.026 | 2.00 | 2.4290 | 3.09 | 0.040 |
| Si | 4 | As | -3 | 6   | 0.340 | 2.3877 | 6.00 | 0.070 | 3.67 | 2.3878 | 2.85 | 0.070 | 3.67 | 2.3907 | 3.02 | 0.082 |
| Si | 4 | F  | -1 | 6   | 0.529 | 1.4565 | 5.50 | 0.041 | 6.00 | 1.4681 | 2.45 | 0.043 | 6.00 | 1.5325 | 2.35 | 0.062 |
| Si | 4 | N  | -3 | 47  | 0.455 | 1.7120 | 6.00 | 0.095 | 4.00 | 1.7374 | 2.40 | 0.095 | 4.00 | 1.7369 | 2.40 | 0.117 |
| Si | 4 | O  | -2 | 220 | 0.432 | 1.6082 | 5.00 | 0.097 | 4.10 | 1.6233 | 2.26 | 0.116 | 4.10 | 1.6244 | 2.30 | 0.136 |
| Si | 4 | P  | -3 | 4   | 0.404 | 2.2567 | 6.50 | 0.114 | 4.00 | 2.2591 | 2.84 | 0.097 | 4.00 | 2.2591 | 2.92 | 0.106 |
| Si | 4 | Se | -2 | 8   | 0.593 | 2.2355 | 6.50 | 0.043 | 4.00 | 2.2645 | 3.12 | 0.052 | 4.00 | 2.2639 | 2.93 | 0.088 |
| Si | 4 | S  | -2 | 19  | 0.560 | 2.0998 | 6.50 | 0.096 | 4.00 | 2.1248 | 2.94 | 0.106 | 4.00 | 2.1241 | 2.79 | 0.157 |
| Sm | 3 | F  | -1 | 7   | 0.441 | 1.8884 | 5.50 | 0.037 | 8.43 | 1.9014 | 3.00 | 0.038 | 8.43 | 1.9738 | 3.02 | 0.041 |
| Sm | 3 | O  | -2 | 42  | 0.433 | 2.0117 | 5.50 | 0.118 | 7.81 | 2.0256 | 3.07 | 0.126 | 7.81 | 2.0831 | 3.10 | 0.140 |
| Sm | 3 | S  | -2 | 6   | 0.505 | 2.4146 | 6.00 | 0.106 | 7.67 | 2.4271 | 3.63 | 0.111 | 7.67 | 2.5505 | 3.56 | 0.150 |
| Sm | 3 | Te | -2 | 1   | 0.581 | 2.7198 | 7.00 | 0.000 | 6.00 | 2.7303 | 3.97 | 0.000 | 6.00 | 2.8765 | 3.80 | 0.000 |
| Sn | 2 | As | -3 | 5   | 0.695 | 2.3837 | 7.00 | 0.015 | 3.00 | 2.4700 | 3.76 | 0.097 | 3.00 | 2.6010 | 3.41 | 0.183 |
| Sn | 2 | Br | -1 | 2   | 0.501 | 2.3737 | 6.00 | 0.107 | 7.00 | 2.3753 | 3.73 | 0.114 | 7.00 | 2.5253 | 3.65 | 0.191 |
| Sn | 2 | Cl | -1 | 5   | 0.461 | 2.2876 | 5.50 | 0.127 | 5.80 | 2.3070 | 3.46 | 0.185 | 5.60 | 2.3909 | 3.43 | 0.226 |
| Sn | 2 | I  | -1 | 10  | 0.562 | 2.5438 | 7.00 | 0.078 | 6.30 | 2.5554 | 4.01 | 0.097 | 6.30 | 2.7659 | 3.85 | 0.147 |
| Sn | 2 | O  | -2 | 34  | 0.458 | 1.8750 | 5.50 | 0.085 | 3.68 | 1.9212 | 2.86 | 0.213 | 3.65 | 1.9672 | 2.85 | 0.309 |
| Sn | 2 | P  | -3 | 2   | 0.550 | 2.2997 | 6.50 | 0.083 | 3.00 | 2.3282 | 3.35 | 0.094 | 3.00 | 2.4001 | 3.21 | 0.139 |
| Sn | 2 | Sb | -3 | 1   | 0.655 | 2.5878 | 7.00 | 0.000 | 3.00 | 2.6174 | 3.83 | 0.000 | 3.00 | 2.7330 | 3.55 | 0.000 |
| Sn | 2 | S  | -2 | 15  | 0.479 | 2.3250 | 6.00 | 0.073 | 5.60 | 2.3554 | 3.54 | 0.090 | 5.27 | 2.4481 | 3.47 | 0.142 |
| Sn | 4 | As | -3 | 5   | 0.522 | 2.5816 | 6.50 | 0.115 | 4.00 | 2.5988 | 3.35 | 0.100 | 4.00 | 2.5987 | 3.26 | 0.140 |
| Sn | 4 | Cl | -1 | 9   | 0.588 | 2.1764 | 6.50 | 0.069 | 5.89 | 2.1904 | 3.27 | 0.105 | 5.89 | 2.2738 | 3.08 | 0.097 |
| Sn | 4 | F  | -1 | 18  | 0.461 | 1.7556 | 5.50 | 0.047 | 6.00 | 1.7701 | 2.62 | 0.060 | 6.00 | 1.8068 | 2.62 | 0.072 |

|    |   |    |    |    |       |        |      |       |       |        |      |       |       |        |      |       |
|----|---|----|----|----|-------|--------|------|-------|-------|--------|------|-------|-------|--------|------|-------|
| Sn | 4 | N  | -3 | 3  | 0.449 | 1.9936 | 6.00 | 0.005 | 6.00  | 1.9953 | 2.83 | 0.004 | 6.00  | 2.0273 | 2.84 | 0.005 |
| Sn | 4 | O  | -2 | 29 | 0.379 | 1.8902 | 5.00 | 0.075 | 6.07  | 1.8959 | 2.60 | 0.074 | 6.07  | 1.8996 | 2.72 | 0.076 |
| Sn | 4 | P  | -3 | 3  | 0.523 | 2.5374 | 6.50 | 0.000 | 4.00  | 2.5484 | 3.31 | 0.027 | 4.00  | 2.5477 | 3.21 | 0.038 |
| Sn | 4 | Se | -2 | 19 | 0.522 | 2.5073 | 6.00 | 0.057 | 4.11  | 2.5221 | 3.29 | 0.081 | 4.11  | 2.5241 | 3.20 | 0.117 |
| Sn | 4 | S  | -2 | 24 | 0.492 | 2.3626 | 6.00 | 0.072 | 5.00  | 2.3778 | 3.20 | 0.085 | 5.00  | 2.4017 | 3.15 | 0.192 |
| Sn | 4 | Te | -2 | 4  | 0.568 | 2.7311 | 7.00 | 0.010 | 4.00  | 2.7661 | 3.59 | 0.086 | 4.00  | 2.7657 | 3.43 | 0.128 |
| Sr | 2 | As | -3 | 9  | 0.568 | 2.5125 | 8.00 | 0.083 | 6.44  | 2.5296 | 4.02 | 0.089 | 6.44  | 2.7559 | 3.85 | 0.151 |
| Sr | 2 | Cl | -1 | 2  | 0.573 | 2.2020 | 6.50 | 0.038 | 7.00  | 2.2460 | 3.79 | 0.069 | 7.00  | 2.4984 | 3.62 | 0.052 |
| Sr | 2 | F  | -1 | 36 | 0.446 | 1.8682 | 5.50 | 0.080 | 8.83  | 1.8899 | 3.20 | 0.097 | 8.89  | 1.9987 | 3.21 | 0.111 |
| Sr | 2 | H  | -1 | 4  | 0.470 | 1.8127 | 6.00 | 0.074 | 11.75 | 1.8344 | 3.35 | 0.053 | 11.75 | 2.0049 | 3.32 | 0.078 |
| Sr | 2 | N  | -3 | 7  | 0.544 | 2.0948 | 6.50 | 0.083 | 6.43  | 2.1297 | 3.55 | 0.110 | 6.14  | 2.3195 | 3.40 | 0.137 |
| Sr | 2 | O  | -2 | 85 | 0.455 | 1.9531 | 5.50 | 0.101 | 9.20  | 1.9712 | 3.32 | 0.117 | 9.20  | 2.0945 | 3.32 | 0.135 |
| Sr | 2 | P  | -3 | 8  | 0.663 | 2.3784 | 7.50 | 0.109 | 6.13  | 2.4171 | 4.12 | 0.111 | 6.13  | 2.7389 | 3.82 | 0.209 |
| Sr | 2 | Sb | -3 | 7  | 0.518 | 2.7880 | 8.00 | 0.093 | 7.00  | 2.7953 | 4.19 | 0.094 | 7.00  | 2.9733 | 4.10 | 0.177 |
| Sr | 2 | Se | -2 | 11 | 0.622 | 2.3672 | 7.00 | 0.075 | 8.00  | 2.3951 | 4.16 | 0.068 | 8.00  | 2.7379 | 3.91 | 0.129 |
| Sr | 2 | S  | -2 | 27 | 0.591 | 2.2677 | 7.00 | 0.098 | 8.15  | 2.2990 | 3.98 | 0.089 | 8.04  | 2.6021 | 3.78 | 0.116 |
| Ta | 2 | Te | -2 | 4  | 0.593 | 2.2069 | 6.00 | 0.174 | 5.25  | 2.2447 | 3.68 | 0.158 | 5.25  | 2.4236 | 3.44 | 0.573 |
| Ta | 3 | F  | -1 | 5  | 0.555 | 1.5231 | 6.00 | 0.073 | 6.00  | 1.5510 | 2.74 | 0.066 | 6.00  | 1.6743 | 2.59 | 0.116 |
| Ta | 4 | O  | -2 | 2  | 0.546 | 1.7563 | 6.00 | 0.516 | 5.50  | 1.7861 | 2.75 | 0.526 | 5.50  | 1.8413 | 2.62 | 0.596 |
| Ta | 4 | Se | -2 | 6  | 0.422 | 2.3613 | 6.00 | 0.001 | 6.00  | 2.3697 | 3.15 | 0.002 | 6.00  | 2.3908 | 3.20 | 0.002 |
| Ta | 4 | S  | -2 | 6  | 0.410 | 2.2893 | 5.50 | 0.043 | 5.67  | 2.2954 | 3.03 | 0.056 | 5.67  | 2.3083 | 3.10 | 0.123 |
| Ta | 5 | Cl | -1 | 2  | 0.604 | 2.2144 | 6.50 | 0.023 | 6.00  | 2.2366 | 3.22 | 0.029 | 6.00  | 2.2772 | 3.01 | 0.033 |
| Ta | 5 | F  | -1 | 5  | 0.477 | 1.7901 | 5.50 | 0.031 | 6.40  | 1.8011 | 2.61 | 0.071 | 6.40  | 1.8264 | 2.58 | 0.047 |
| Ta | 5 | N  | -3 | 6  | 0.390 | 2.0412 | 6.00 | 0.047 | 4.67  | 2.0446 | 2.58 | 0.064 | 4.67  | 2.0428 | 2.68 | 0.099 |
| Ta | 5 | O  | -2 | 89 | 0.486 | 1.8682 | 5.50 | 0.113 | 6.09  | 1.8902 | 2.69 | 0.138 | 6.09  | 1.9104 | 2.65 | 0.163 |
| Ta | 5 | Se | -2 | 3  | 0.654 | 2.5126 | 7.00 | 0.013 | 4.00  | 2.5415 | 3.34 | 0.122 | 4.00  | 2.4779 | 3.06 | 0.214 |
| Ta | 5 | S  | -2 | 6  | 0.622 | 2.2474 | 6.50 | 0.254 | 7.17  | 2.2847 | 3.41 | 0.212 | 7.17  | 2.3711 | 3.17 | 0.199 |
| Ta | 5 | Te | -2 | 2  | 0.699 | 2.7182 | 7.00 | 0.002 | 4.00  | 2.7915 | 3.65 | 0.103 | 4.00  | 2.7178 | 3.30 | 0.195 |
| Tb | 3 | Cl | -1 | 2  | 0.486 | 2.2953 | 6.00 | 0.013 | 8.50  | 2.3068 | 3.52 | 0.023 | 8.50  | 2.4256 | 3.47 | 0.029 |
| Tb | 3 | F  | -1 | 3  | 0.442 | 1.8404 | 5.50 | 0.013 | 8.67  | 1.8537 | 2.96 | 0.034 | 8.67  | 1.9288 | 2.98 | 0.067 |

|    |   |    |    |     |       |        |      |       |      |        |      |       |      |        |      |       |
|----|---|----|----|-----|-------|--------|------|-------|------|--------|------|-------|------|--------|------|-------|
| Tb | 3 | O  | -2 | 24  | 0.433 | 1.9568 | 5.50 | 0.064 | 7.83 | 1.9710 | 3.01 | 0.086 | 7.83 | 2.0297 | 3.05 | 0.108 |
| Tb | 3 | S  | -2 | 5   | 0.505 | 2.3638 | 6.00 | 0.117 | 7.60 | 2.3760 | 3.58 | 0.114 | 7.60 | 2.4985 | 3.51 | 0.211 |
| Tb | 4 | O  | -2 | 7   | 0.494 | 1.9624 | 6.00 | 0.072 | 6.00 | 1.9784 | 2.89 | 0.059 | 6.00 | 2.0280 | 2.84 | 0.072 |
| Tc | 4 | Cl | -1 | 2   | 0.470 | 2.1586 | 6.00 | 0.011 | 6.00 | 2.1649 | 3.04 | 0.047 | 6.00 | 2.2040 | 3.02 | 0.044 |
| Tc | 7 | O  | -2 | 4   | 0.514 | 1.9643 | 6.00 | 0.105 | 4.00 | 1.9983 | 2.45 | 0.124 | 4.00 | 1.9173 | 2.37 | 0.174 |
| Te | 4 | Br | -1 | 6   | 0.559 | 2.4611 | 7.00 | 0.038 | 6.00 | 2.4696 | 3.51 | 0.053 | 6.00 | 2.5395 | 3.35 | 0.111 |
| Te | 4 | Cl | -1 | 20  | 0.518 | 2.3056 | 6.50 | 0.077 | 5.90 | 2.3240 | 3.27 | 0.110 | 5.85 | 2.3590 | 3.16 | 0.136 |
| Te | 4 | I  | -1 | 14  | 0.619 | 2.6767 | 7.50 | 0.082 | 6.00 | 2.7009 | 3.85 | 0.105 | 5.93 | 2.7796 | 3.59 | 0.127 |
| Te | 4 | O  | -2 | 106 | 0.401 | 1.9529 | 5.50 | 0.099 | 3.54 | 1.9850 | 2.52 | 0.164 | 3.67 | 1.9772 | 2.61 | 0.164 |
| Te | 6 | O  | -2 | 27  | 0.412 | 1.9134 | 5.50 | 0.139 | 6.00 | 1.9205 | 2.52 | 0.124 | 6.00 | 1.9204 | 2.58 | 0.136 |
| Th | 4 | F  | -1 | 18  | 0.477 | 1.9737 | 6.00 | 0.114 | 8.94 | 1.9889 | 3.06 | 0.087 | 8.94 | 2.0735 | 3.03 | 0.099 |
| Th | 4 | O  | -2 | 34  | 0.486 | 2.0490 | 6.00 | 0.114 | 8.85 | 2.0699 | 3.16 | 0.142 | 8.82 | 2.1569 | 3.11 | 0.197 |
| Th | 4 | S  | -2 | 3   | 0.500 | 2.5291 | 6.50 | 0.114 | 8.67 | 2.5412 | 3.65 | 0.102 | 8.67 | 2.6357 | 3.58 | 0.082 |
| Ti | 2 | Br | -1 | 3   | 0.470 | 2.1549 | 6.00 | 0.107 | 6.00 | 2.1620 | 3.36 | 0.095 | 6.00 | 2.2713 | 3.34 | 0.117 |
| Ti | 2 | Cl | -1 | 6   | 0.429 | 2.0343 | 5.50 | 0.043 | 5.67 | 2.0420 | 3.11 | 0.040 | 5.67 | 2.1024 | 3.15 | 0.050 |
| Ti | 3 | Cl | -1 | 7   | 0.459 | 2.1275 | 6.00 | 0.079 | 6.00 | 2.1368 | 3.12 | 0.098 | 6.00 | 2.1982 | 3.12 | 0.127 |
| Ti | 3 | F  | -1 | 13  | 0.468 | 1.6307 | 5.50 | 0.050 | 6.00 | 1.6411 | 2.64 | 0.043 | 6.00 | 1.7086 | 2.63 | 0.056 |
| Ti | 3 | O  | -2 | 38  | 0.460 | 1.6977 | 5.50 | 0.049 | 6.00 | 1.7203 | 2.70 | 0.071 | 6.00 | 1.7822 | 2.70 | 0.087 |
| Ti | 3 | S  | -2 | 5   | 0.478 | 2.1181 | 6.00 | 0.067 | 6.00 | 2.1339 | 3.16 | 0.065 | 6.00 | 2.2083 | 3.13 | 0.085 |
| Ti | 4 | As | -3 | 5   | 0.770 | 2.4382 | 7.50 | 0.126 | 4.00 | 2.4779 | 3.59 | 0.103 | 4.00 | 2.4777 | 3.14 | 0.213 |
| Ti | 4 | Cl | -1 | 6   | 0.507 | 2.1258 | 6.00 | 0.089 | 6.00 | 2.1340 | 3.07 | 0.061 | 6.00 | 2.1864 | 3.00 | 0.109 |
| Ti | 4 | F  | -1 | 7   | 0.449 | 1.6617 | 5.50 | 0.034 | 6.00 | 1.6743 | 2.51 | 0.038 | 6.00 | 1.7034 | 2.52 | 0.041 |
| Ti | 4 | O  | -2 | 173 | 0.503 | 1.7239 | 5.50 | 0.093 | 5.99 | 1.7507 | 2.68 | 0.104 | 5.98 | 1.8004 | 2.61 | 0.142 |
| Ti | 4 | P  | -3 | 4   | 0.670 | 2.3749 | 6.50 | 0.094 | 4.00 | 2.3921 | 3.36 | 0.074 | 4.00 | 2.3920 | 3.05 | 0.133 |
| Ti | 4 | S  | -2 | 5   | 0.640 | 2.1745 | 7.00 | 0.198 | 5.00 | 2.2072 | 3.28 | 0.174 | 5.00 | 2.2586 | 3.00 | 0.188 |
| Ti | 4 | Te | -2 | 3   | 0.716 | 2.4179 | 7.50 | 0.225 | 6.00 | 2.4988 | 3.83 | 0.171 | 6.00 | 2.6357 | 3.45 | 0.280 |
| Tl | 1 | Br | -1 | 10  | 0.477 | 2.4277 | 6.00 | 0.064 | 8.20 | 2.4345 | 4.13 | 0.060 | 8.20 | 2.6526 | 4.09 | 0.066 |
| Tl | 1 | Cl | -1 | 8   | 0.436 | 2.3679 | 6.00 | 0.050 | 8.38 | 2.3734 | 3.93 | 0.052 | 8.50 | 2.5113 | 3.97 | 0.053 |
| Tl | 1 | F  | -1 | 16  | 0.491 | 1.8274 | 6.00 | 0.054 | 9.63 | 1.8587 | 3.68 | 0.065 | 9.63 | 2.1165 | 3.62 | 0.119 |
| Tl | 1 | I  | -1 | 15  | 0.537 | 2.4869 | 7.00 | 0.037 | 8.07 | 2.4943 | 4.39 | 0.035 | 7.87 | 2.8354 | 4.26 | 0.061 |

|    |   |    |    |    |       |        |      |       |      |        |      |       |      |        |      |       |
|----|---|----|----|----|-------|--------|------|-------|------|--------|------|-------|------|--------|------|-------|
| Tl | 1 | O  | -2 | 65 | 0.483 | 1.8902 | 6.00 | 0.086 | 8.02 | 1.9302 | 3.63 | 0.087 | 7.91 | 2.1408 | 3.57 | 0.167 |
| Tl | 1 | Se | -2 | 31 | 0.486 | 2.3994 | 6.00 | 0.063 | 7.81 | 2.4094 | 4.11 | 0.067 | 7.81 | 2.6335 | 4.06 | 0.087 |
| Tl | 1 | S  | -2 | 88 | 0.455 | 2.3826 | 6.00 | 0.074 | 7.18 | 2.3945 | 3.95 | 0.078 | 7.15 | 2.5505 | 3.94 | 0.094 |
| Tl | 1 | Te | -2 | 16 | 0.531 | 2.5052 | 6.00 | 0.086 | 6.38 | 2.5165 | 4.27 | 0.098 | 6.38 | 2.8031 | 4.15 | 0.099 |
| Tl | 3 | Br | -1 | 4  | 0.555 | 2.3599 | 6.00 | 0.028 | 4.50 | 2.3780 | 3.41 | 0.086 | 4.50 | 2.4478 | 3.26 | 0.122 |
| Tl | 3 | Cl | -1 | 9  | 0.514 | 2.2257 | 6.00 | 0.053 | 5.78 | 2.2329 | 3.31 | 0.099 | 5.78 | 2.3214 | 3.23 | 0.070 |
| Tl | 3 | F  | -1 | 4  | 0.413 | 1.8568 | 5.50 | 0.326 | 7.00 | 1.8641 | 2.81 | 0.326 | 7.00 | 1.8978 | 2.87 | 0.360 |
| Tl | 3 | O  | -2 | 18 | 0.338 | 2.0634 | 5.00 | 0.102 | 4.72 | 2.0719 | 2.71 | 0.170 | 5.06 | 2.0534 | 2.91 | 0.125 |
| Tm | 3 | O  | -2 | 34 | 0.421 | 1.9490 | 5.50 | 0.089 | 6.79 | 1.9590 | 2.91 | 0.082 | 6.85 | 1.9989 | 2.97 | 0.108 |
| Tm | 3 | S  | -2 | 16 | 0.516 | 2.3107 | 6.00 | 0.062 | 6.31 | 2.3273 | 3.46 | 0.059 | 6.31 | 2.4335 | 3.37 | 0.114 |
| U  | 3 | Cl | -1 | 8  | 0.494 | 2.3838 | 7.00 | 0.092 | 7.25 | 2.3911 | 3.54 | 0.088 | 7.25 | 2.4973 | 3.49 | 0.235 |
| U  | 3 | S  | -2 | 6  | 0.600 | 2.2641 | 7.00 | 0.094 | 7.67 | 2.3003 | 3.73 | 0.113 | 7.67 | 2.5109 | 3.52 | 0.253 |
| U  | 4 | Cl | -1 | 6  | 0.535 | 2.3815 | 7.00 | 0.113 | 7.33 | 2.3942 | 3.49 | 0.105 | 7.33 | 2.4862 | 3.37 | 0.254 |
| U  | 4 | O  | -2 | 10 | 0.428 | 2.0478 | 6.00 | 0.097 | 7.40 | 2.0604 | 2.94 | 0.093 | 7.40 | 2.0926 | 2.98 | 0.113 |
| U  | 4 | Se | -2 | 6  | 0.666 | 2.4430 | 7.50 | 0.124 | 8.33 | 2.4848 | 3.94 | 0.105 | 8.17 | 2.6948 | 3.62 | 0.245 |
| U  | 4 | S  | -2 | 9  | 0.523 | 2.4512 | 7.00 | 0.120 | 7.67 | 2.4698 | 3.57 | 0.111 | 7.67 | 2.5656 | 3.47 | 0.212 |
| U  | 5 | Cl | -1 | 3  | 0.550 | 2.3908 | 7.00 | 0.014 | 6.00 | 2.4104 | 3.31 | 0.016 | 6.00 | 2.4395 | 3.17 | 0.027 |
| U  | 5 | O  | -2 | 11 | 0.494 | 2.0114 | 6.00 | 0.130 | 6.55 | 2.0375 | 2.89 | 0.148 | 6.55 | 2.0665 | 2.83 | 0.168 |
| U  | 6 | Cl | -1 | 5  | 0.660 | 2.3859 | 7.00 | 0.104 | 6.00 | 2.4303 | 3.39 | 0.122 | 6.00 | 2.4293 | 3.09 | 0.209 |
| U  | 6 | O  | -2 | 79 | 0.527 | 2.0232 | 6.00 | 0.116 | 7.00 | 2.0467 | 2.89 | 0.149 | 6.99 | 2.0396 | 2.76 | 0.238 |
| V  | 2 | Br | -1 | 2  | 0.483 | 2.1022 | 6.00 | 0.039 | 6.00 | 2.1053 | 3.33 | 0.041 | 6.00 | 2.2294 | 3.30 | 0.054 |
| V  | 2 | Cl | -1 | 4  | 0.442 | 2.0327 | 5.50 | 0.061 | 6.00 | 2.0393 | 3.16 | 0.074 | 6.00 | 2.1183 | 3.19 | 0.089 |
| V  | 2 | F  | -1 | 7  | 0.485 | 1.5330 | 5.50 | 0.081 | 6.00 | 1.5539 | 2.79 | 0.071 | 6.00 | 1.6802 | 2.75 | 0.092 |
| V  | 2 | O  | -2 | 4  | 0.477 | 1.5998 | 5.50 | 0.081 | 6.00 | 1.6158 | 2.83 | 0.082 | 6.00 | 1.7329 | 2.80 | 0.103 |
| V  | 2 | S  | -2 | 2  | 0.461 | 1.8982 | 6.00 | 0.036 | 6.00 | 1.9162 | 3.09 | 0.038 | 6.00 | 2.0160 | 3.09 | 0.047 |
| V  | 3 | Cl | -1 | 2  | 0.480 | 2.0633 | 5.50 | 0.038 | 6.00 | 2.0716 | 3.10 | 0.081 | 6.00 | 2.1472 | 3.07 | 0.110 |
| V  | 3 | F  | -1 | 13 | 0.448 | 1.6158 | 5.50 | 0.060 | 6.00 | 1.6265 | 2.59 | 0.047 | 6.00 | 1.6805 | 2.60 | 0.057 |
| V  | 3 | O  | -2 | 63 | 0.439 | 1.6780 | 5.50 | 0.067 | 6.00 | 1.6959 | 2.64 | 0.070 | 6.00 | 1.7431 | 2.66 | 0.083 |
| V  | 3 | Se | -2 | 3  | 0.530 | 2.1369 | 6.50 | 0.036 | 6.00 | 2.1638 | 3.30 | 0.039 | 6.00 | 2.2728 | 3.19 | 0.049 |
| V  | 3 | S  | -2 | 25 | 0.499 | 2.0262 | 6.50 | 0.047 | 5.92 | 2.0495 | 3.11 | 0.049 | 5.92 | 2.1350 | 3.05 | 0.111 |

|    |   |    |    |     |       |        |      |       |       |        |      |       |       |        |      |       |
|----|---|----|----|-----|-------|--------|------|-------|-------|--------|------|-------|-------|--------|------|-------|
| V  | 4 | O  | -2 | 84  | 0.426 | 1.7493 | 5.00 | 0.094 | 5.73  | 1.7610 | 2.53 | 0.090 | 5.74  | 1.7749 | 2.57 | 0.089 |
| V  | 4 | S  | -2 | 3   | 0.512 | 2.1676 | 6.50 | 0.004 | 6.00  | 2.1771 | 3.13 | 0.004 | 6.00  | 2.2346 | 3.05 | 0.005 |
| V  | 5 | O  | -2 | 174 | 0.510 | 1.7945 | 5.50 | 0.113 | 4.15  | 1.8280 | 2.47 | 0.121 | 4.14  | 1.7991 | 2.39 | 0.189 |
| V  | 5 | S  | -2 | 7   | 0.647 | 2.2925 | 7.00 | 0.061 | 4.00  | 2.3238 | 3.12 | 0.137 | 4.00  | 2.2618 | 2.84 | 0.237 |
| W  | 2 | Br | -1 | 5   | 0.647 | 1.9572 | 7.00 | 0.058 | 5.00  | 2.0190 | 3.55 | 0.050 | 5.00  | 2.2721 | 3.27 | 0.092 |
| W  | 3 | Cl | -1 | 3   | 0.428 | 2.1224 | 5.00 | 0.117 | 5.67  | 2.1293 | 3.02 | 0.080 | 5.67  | 2.1653 | 3.06 | 0.135 |
| W  | 4 | Br | -1 | 2   | 0.439 | 2.3517 | 6.50 | 0.097 | 6.00  | 2.3524 | 3.17 | 0.096 | 6.00  | 2.3803 | 3.19 | 0.113 |
| W  | 4 | O  | -2 | 4   | 0.520 | 1.7456 | 6.00 | 0.060 | 6.00  | 1.8012 | 2.76 | 0.060 | 6.00  | 1.8594 | 2.67 | 0.085 |
| W  | 4 | S  | -2 | 2   | 0.417 | 2.2227 | 6.00 | 0.009 | 6.00  | 2.2348 | 3.01 | 0.010 | 6.00  | 2.2539 | 3.07 | 0.012 |
| W  | 5 | Cl | -1 | 7   | 0.420 | 2.2449 | 6.00 | 0.050 | 6.00  | 2.2471 | 2.93 | 0.045 | 6.00  | 2.2555 | 2.99 | 0.055 |
| W  | 5 | O  | -2 | 5   | 0.498 | 1.8197 | 6.00 | 0.054 | 6.00  | 1.8497 | 2.66 | 0.156 | 6.00  | 1.8723 | 2.60 | 0.206 |
| W  | 6 | Cl | -1 | 3   | 0.617 | 2.2150 | 7.00 | 0.082 | 6.00  | 2.2491 | 3.14 | 0.084 | 6.00  | 2.2411 | 2.90 | 0.161 |
| W  | 6 | O  | -2 | 77  | 0.401 | 1.9064 | 5.00 | 0.140 | 5.69  | 1.9136 | 2.47 | 0.163 | 5.69  | 1.9103 | 2.55 | 0.155 |
| Xe | 2 | F  | -1 | 8   | 0.569 | 1.7741 | 6.50 | 0.035 | 2.00  | 2.0010 | 2.82 | 0.050 | 2.00  | 1.9955 | 2.66 | 0.076 |
| Xe | 4 | F  | -1 | 7   | 0.529 | 1.8557 | 6.50 | 0.078 | 4.14  | 1.9360 | 2.72 | 0.145 | 4.00  | 1.9345 | 2.60 | 0.193 |
| Xe | 6 | F  | -1 | 13  | 0.431 | 1.8616 | 6.00 | 0.059 | 5.46  | 1.9009 | 2.48 | 0.156 | 5.62  | 1.8913 | 2.53 | 0.141 |
| Y  | 3 | Br | -1 | 3   | 0.522 | 2.4092 | 6.50 | 0.035 | 6.00  | 2.4143 | 3.53 | 0.049 | 6.00  | 2.5184 | 3.44 | 0.068 |
| Y  | 3 | Cl | -1 | 10  | 0.483 | 2.2887 | 6.50 | 0.043 | 6.40  | 2.2930 | 3.36 | 0.047 | 6.40  | 2.3773 | 3.32 | 0.115 |
| Y  | 3 | F  | -1 | 17  | 0.379 | 1.8926 | 5.50 | 0.086 | 7.53  | 1.8971 | 2.79 | 0.088 | 7.53  | 1.9053 | 2.91 | 0.090 |
| Y  | 3 | N  | -3 | 7   | 0.620 | 1.9433 | 6.50 | 0.046 | 6.00  | 1.9695 | 3.30 | 0.086 | 6.00  | 2.1415 | 3.06 | 0.148 |
| Y  | 3 | O  | -2 | 130 | 0.478 | 1.9038 | 5.50 | 0.140 | 7.28  | 1.9245 | 3.04 | 0.131 | 7.28  | 2.0179 | 3.01 | 0.167 |
| Y  | 3 | S  | -2 | 12  | 0.615 | 2.2592 | 7.00 | 0.068 | 6.42  | 2.2990 | 3.66 | 0.081 | 6.42  | 2.4803 | 3.42 | 0.117 |
| Yb | 2 | Cl | -1 | 2   | 0.409 | 2.2946 | 5.50 | 0.131 | 6.50  | 2.2971 | 3.37 | 0.144 | 6.50  | 2.3424 | 3.44 | 0.174 |
| Yb | 2 | H  | -1 | 4   | 0.496 | 1.5795 | 6.00 | 0.112 | 10.00 | 1.6118 | 3.13 | 0.113 | 10.00 | 1.8103 | 3.07 | 0.138 |
| Yb | 2 | O  | -2 | 2   | 0.510 | 1.6325 | 5.50 | 0.014 | 7.00  | 1.6684 | 3.05 | 0.052 | 7.00  | 1.8417 | 2.97 | 0.034 |
| Yb | 2 | Se | -2 | 2   | 0.458 | 2.4405 | 7.00 | 0.071 | 6.00  | 2.4466 | 3.61 | 0.070 | 6.00  | 2.5432 | 3.61 | 0.086 |
| Yb | 2 | S  | -2 | 4   | 0.427 | 2.4008 | 6.00 | 0.183 | 7.75  | 2.4063 | 3.60 | 0.178 | 7.75  | 2.4826 | 3.65 | 0.227 |
| Yb | 3 | F  | -1 | 14  | 0.435 | 1.8097 | 5.50 | 0.063 | 7.50  | 1.8184 | 2.85 | 0.053 | 7.50  | 1.8768 | 2.88 | 0.068 |
| Yb | 3 | O  | -2 | 64  | 0.426 | 1.9287 | 5.50 | 0.089 | 6.86  | 1.9404 | 2.91 | 0.081 | 6.86  | 1.9856 | 2.95 | 0.092 |
| Yb | 3 | Se | -2 | 1   | 0.542 | 2.4211 | 7.00 | 0.000 | 6.00  | 2.4336 | 3.59 | 0.000 | 6.00  | 2.5528 | 3.47 | 0.000 |



|    |   |    |    |     |       |        |      |       |      |        |      |       |      |        |      |       |
|----|---|----|----|-----|-------|--------|------|-------|------|--------|------|-------|------|--------|------|-------|
| Yb | 3 | S  | -2 | 16  | 0.511 | 2.3124 | 6.00 | 0.133 | 6.13 | 2.3253 | 3.43 | 0.136 | 6.13 | 2.4239 | 3.35 | 0.168 |
| Zn | 2 | As | -3 | 14  | 0.770 | 1.8475 | 7.50 | 0.166 | 4.14 | 1.9698 | 3.64 | 0.109 | 4.14 | 2.2551 | 3.19 | 0.296 |
| Zn | 2 | Br | -1 | 6   | 0.562 | 1.9874 | 6.00 | 0.026 | 4.00 | 2.0037 | 3.21 | 0.054 | 4.00 | 2.1365 | 3.06 | 0.082 |
| Zn | 2 | Cl | -1 | 19  | 0.521 | 1.8819 | 6.00 | 0.035 | 4.00 | 1.8960 | 3.01 | 0.060 | 4.00 | 2.0005 | 2.92 | 0.083 |
| Zn | 2 | F  | -1 | 26  | 0.406 | 1.5745 | 5.00 | 0.063 | 5.77 | 1.5868 | 2.60 | 0.099 | 5.92 | 1.6230 | 2.69 | 0.085 |
| Zn | 2 | I  | -1 | 4   | 0.622 | 2.1528 | 6.50 | 0.024 | 4.00 | 2.1884 | 3.52 | 0.026 | 4.00 | 2.3625 | 3.28 | 0.042 |
| Zn | 2 | O  | -2 | 174 | 0.403 | 1.6534 | 5.00 | 0.075 | 4.72 | 1.6713 | 2.60 | 0.085 | 4.72 | 1.6986 | 2.68 | 0.086 |
| Zn | 2 | P  | -3 | 13  | 0.440 | 2.1530 | 7.00 | 0.152 | 3.77 | 2.1622 | 3.08 | 0.137 | 3.77 | 2.2044 | 3.10 | 0.157 |
| Zn | 2 | Se | -2 | 4   | 0.571 | 2.0007 | 6.00 | 0.011 | 4.00 | 2.0451 | 3.27 | 0.031 | 4.00 | 2.1844 | 3.10 | 0.048 |
| Zn | 2 | S  | -2 | 23  | 0.540 | 1.9437 | 6.00 | 0.071 | 4.17 | 1.9782 | 3.16 | 0.071 | 4.17 | 2.1012 | 3.04 | 0.138 |
| Zn | 2 | Te | -2 | 5   | 0.616 | 2.1513 | 7.00 | 0.082 | 4.00 | 2.1912 | 3.51 | 0.077 | 4.00 | 2.3614 | 3.28 | 0.130 |
| Zr | 2 | Cl | -1 | 5   | 0.478 | 2.1207 | 6.00 | 0.087 | 5.00 | 2.1386 | 3.27 | 0.084 | 5.00 | 2.2362 | 3.24 | 0.104 |
| Zr | 2 | H  | -1 | 7   | 0.582 | 1.1980 | 6.00 | 0.050 | 8.14 | 1.2736 | 2.93 | 0.061 | 8.14 | 1.5702 | 2.75 | 0.130 |
| Zr | 2 | I  | -1 | 4   | 0.424 | 2.4930 | 5.50 | 0.007 | 6.00 | 2.4992 | 3.58 | 0.007 | 6.00 | 2.5579 | 3.63 | 0.009 |
| Zr | 3 | I  | -1 | 3   | 0.472 | 2.5662 | 6.00 | 0.018 | 6.00 | 2.5703 | 3.58 | 0.030 | 6.00 | 2.6409 | 3.56 | 0.038 |
| Zr | 4 | Br | -1 | 3   | 0.648 | 2.3281 | 7.00 | 0.034 | 6.00 | 2.3608 | 3.56 | 0.016 | 6.00 | 2.4658 | 3.28 | 0.007 |
| Zr | 4 | Cl | -1 | 7   | 0.608 | 2.1844 | 6.50 | 0.030 | 6.00 | 2.2127 | 3.34 | 0.075 | 6.00 | 2.3075 | 3.12 | 0.115 |
| Zr | 4 | F  | -1 | 48  | 0.388 | 1.8317 | 5.50 | 0.083 | 7.08 | 1.8363 | 2.62 | 0.096 | 7.10 | 1.8460 | 2.72 | 0.096 |
| Zr | 4 | N  | -3 | 4   | 0.570 | 2.0104 | 6.50 | 0.071 | 5.50 | 2.0424 | 3.05 | 0.078 | 5.50 | 2.1024 | 2.88 | 0.318 |
| Zr | 4 | O  | -2 | 85  | 0.490 | 1.8451 | 5.50 | 0.141 | 6.76 | 1.8664 | 2.83 | 0.136 | 6.76 | 1.9266 | 2.78 | 0.193 |
| Zr | 4 | S  | -2 | 6   | 0.626 | 2.2627 | 7.00 | 0.034 | 6.33 | 2.2953 | 3.49 | 0.072 | 6.33 | 2.4088 | 3.24 | 0.242 |

Special pseudo-atoms used in the above table:

#1  $Nx^{3-}$  refers to the  $N^{3-}$  anion within a  $CN^-$  group;

#2  $Hx^+$  refers to the apparent proton position in XRD refined structures, while  $H^+$  refers to the actual proton position as determined from structure refinements based on neutron diffraction data. The  $H^+$  parameter should be used to locate a proton in a structure or to check neutron diffraction data, while the separate  $Hx^+$  parameters permit the user to check whether the apparent H position in an XRD structure refinement yields the expected degree of underestimation of e.g. and O-H bond length.

#3  $Nh^+$  represents the ammonium cation  $NH_4^+$  in structure determinations where the  $H^+$  of the  $NH_4^+$  group are not resolved.

**S2. Linear regression results of fitting  $R_{\text{crystal}}$  to  $R_{\text{min}}$  categorized by anion types****Table S2** Linear regression results of fitting  $R_{\text{crystal}}$  (as  $y$ ) to  $R_{\text{min}}$  (as  $x$ ) grouped by anion types.

| anion              | slope  | intercept | $R^2$  |
|--------------------|--------|-----------|--------|
| F <sup>-</sup>     | 0.9949 | -1.1219   | 0.9866 |
| Cl <sup>-</sup>    | 0.9593 | -1.4841   | 0.9760 |
| Br <sup>-</sup>    | 0.9391 | -1.5686   | 0.9584 |
| I <sup>-</sup>     | 0.8747 | -1.5802   | 0.9463 |
| O <sup>2-</sup>    | 0.9901 | -1.2046   | 0.9938 |
| S <sup>2-</sup>    | 0.9383 | -1.5037   | 0.9750 |
| Se <sup>2-</sup>   | 0.9292 | -1.5895   | 0.9487 |
| Te <sup>2-</sup>   | 0.9065 | -1.7255   | 0.8996 |
| N <sup>3-</sup>    | 0.9058 | -1.1665   | 0.9884 |
| Nx <sup>3-</sup> # | 0.7480 | -0.7078   | 0.9798 |
| P <sup>3-</sup>    | 0.8445 | -1.3737   | 0.9390 |
| As <sup>3-</sup>   | 0.9147 | -1.6678   | 0.9660 |
| Sb <sup>3-</sup>   | 0.9362 | -1.9618   | 0.9800 |
| H <sup>-</sup>     | 0.8190 | -0.6465   | 0.9615 |

# Nx<sup>3-</sup> refers to the N<sup>3-</sup> anion within a CN<sup>-</sup> group.

**S3. Estimated Shannon crystal radii****Table S3** Estimated Shannon crystal radii for some ions not reported in Shannon's compilation.

| ion             | V <sub>id</sub> | N <sub>c</sub> | R <sub>crystal</sub> | ion | V <sub>id</sub> | N <sub>c</sub> | R <sub>crystal</sub> |
|-----------------|-----------------|----------------|----------------------|-----|-----------------|----------------|----------------------|
| P               | -3              | -              | 1.777                | S   | 4               | 2              | 0.176                |
| As              | -3              | -              | 2.005                | Sb  | 5               | 4              | 0.698                |
| Sb              | -3              | -              | 2.341                | Se  | 4               | 3              | 0.483                |
| H               | -1              | -              | 0.883                | Si  | 2               | 2              | 0.545                |
| As              | 3               | 3              | 0.605                | Sn  | 2               | 3              | 0.789                |
| Au              | 1               | 2              | 0.710                | Sn  | 2               | 6              | 1.210                |
| Br              | 5               | 6              | 0.723                | Ta  | 2               | 5              | 0.828                |
| C               | 2               | 1              | 0.071                | W   | 2               | 5              | 0.884                |
| Co              | 1               | 2              | 0.527                | Xe  | 2               | 2              | 0.869                |
| Cu              | 3               | 4              | 0.618                | Xe  | 4               | 4              | 0.823                |
| Ga              | 1               | 9              | 1.677                | Zr  | 2               | 5              | 0.988                |
| Ga              | 1               | 8              | 1.504                | Zr  | 2               | 6              | 1.013                |
| Ge              | 2               | 2              | 0.549                | Zr  | 2               | 8              | 1.066                |
| In              | 1               | 8              | 1.595                | Zr  | 3               | 6              | 0.954                |
| Mo              | 2               | 5              | 0.855                |     |                 |                |                      |
| N               | 3               | 1              | -0.039               |     |                 |                |                      |
| Nb              | 2               | 6              | 0.894                |     |                 |                |                      |
| Nh <sup>#</sup> | 1               | 9              | 1.789                |     |                 |                |                      |
| Ni              | 3               | 5              | 0.587                |     |                 |                |                      |
| Np              | 5               | 7              | 0.955                |     |                 |                |                      |
| Np              | 6               | 7              | 0.890                |     |                 |                |                      |
| P               | 3               | 3              | 0.348                |     |                 |                |                      |
| Pt              | 3               | 5              | 0.805                |     |                 |                |                      |
| Re              | 3               | 5              | 0.790                |     |                 |                |                      |
| S               | 3               | 2              | 0.307                |     |                 |                |                      |
| S               | 4               | 3              | 0.360                |     |                 |                |                      |

# Nh<sup>+</sup> represents the ammonium cation NH<sub>4</sub><sup>+</sup>.
